# Supplementary material for: Different cardiovascular and pulmonary phenotypes for single- and double-knock-out mice deficient in BMP9 and BMP10
Source: PubMed Central journal article supplement — Cardiovasc Res. 2021 Jun 4;118(7):1805–20. doi: 10.1093/cvr/cvab187 (PMC9215199; doi:10.1093/cvr/cvab187), 2021-06-04

## SUPPLEMENTAL MATERIALS

### MATERIALS & METHODS

#### **Blood pressure measurements and echocardiographic assessment of left ventricular function**

Systemic blood pressure (BP) was blindly determined in conscious mice by a non-invasive computerized tail-cuff method (CODA Kent Scientific) according to the manufacturer's instructions. For echocardiography, mice were anesthetized under gaseous anaesthesia (isoflurane-Vetflurane, Virbac 1.8-2% in a 1:1 mixture of oxygen:air). Hairs of the thoracic area were removed (hair-removing cream for sensitive skin), and the animal was positioned on a heating platform linked to the echography system (Vevo<sup>®</sup> 2100, VisualSonics) allowing the registration of ECG and respiratory rate. MS-550D (40 MHz) transducer was used for image acquisition; this transducer is specifically dedicated to mouse cardiac imaging (VisualSonics). Standard parameters were obtained using M-mode on "small-axis" views (SAX) and "long-axis" views. Parameters allowed the calculation of thickness of cardiac walls, ventricular volumes (during systole and diastole), estimated left ventricle mass, ejection fraction, fractional shortening, cardiac output and stroke volume.

#### **Invasive right heart catheterization and assessment of pulmonary vascular changes**

Mice were randomized and either studied in room air at 8-14 weeks of age, or were exposed to hypoxia (FiO<sub>2</sub>=10%) for 3 weeks. At the end of these protocols, hemodynamic parameters were blindly measured in unventilated anesthetized mice (isoflurane) using a closed chest technique, by introducing a 1.4-F Millar catheter (ADInstruments, Paris, France) into the jugular vein and directing it to the right ventricle (RV) to assess the right ventricular systolic pressure (RVSP)<sup>1-3</sup>. Euthanasia was performed by exsanguination under isoflurane. The RV hypertrophy was calculated using the Fulton Index [weight ratio of right ventricle and (left ventricle + septum)] and the percentage of wall thickness [(2 × medial wall thickness/ external diameter) × 100] and of muscularized vessels were performed as previously described<sup>3,4</sup>. The pulmonary circulation was flushed with 5mL of buffered saline at 37°C, and then the left lung was prepared for histological analyses and the right lung was quickly harvested, immediately snap-frozen in liquid nitrogen and kept at -80°C.

#### **Microvessel perfusion**

Fluorescent 45 μm microspheres (Polysciences, Inc) were injected into the left cardiac ventricle of anesthetized (isoflurane) to investigate left to right shunting (systemic arteriovenous shunts), or 15 μm microspheres (Life technologies) were injected intravenously to investigate pulmonary shunts in mice as previously described<sup>5</sup>, Euthanasia was performed using an injection of pentobarbital 180 mg/kg, mice were dissected and fluorescent beads trapped in the tissue vasculature were examined using a Zeiss Axiobserver microscope.

Another group of animals was used to visualize the vasculature following perfusion with latex blue. Briefly, mice received a pentobarbital intraperitoneal injection (180 mg/kg). Abdominal and thoracic cavities were open, left and right atria were cut, the left ventricle was punctured with a 26-gauge needle, and a blue latex dye (Connecticut Valley Biological Supply Co.) was slowly and steadily injected. The vasculature was observed and organs of

39 interest were collected, rinsed in PBS and fixed with 10% formalin overnight at 4°C. Tissue clearing procedure  
40 was performed to enhance sample transparency and maximize delineation of the vascular casts using  
41 urea/Quadrol/Triton X-100 and triethanolamine/urea/sucrose solutions. Images were acquired using a Leica  
42 S8APO stereomicroscope.

43

#### 44 **RNA sequencing and real-time quantitative-PCR**

45 Mouse lung tissue was flash frozen in liquid nitrogen and stored at -80°C. RNA extraction, RNA sample quality  
46 assessment, RNA library preparation, sequencing and raw data analysis were conducted at GENEWIZ, Inc. (South  
47 Plainfield, NJ, USA).

48 Total RNA was extracted from frozen tissue using the Qiagen RNeasy Plus Mini kit. RNA samples were quantified  
49 using Qubit 2.0 Fluorometer (Life Technologies, Carlsbad, CA, USA) and RNA integrity was checked with  
50 Agilent TapeStation (Agilent Technologies, Palo Alto, CA, USA).

51 rRNA depletion was performed using Ribozero rRNA Removal Kit (Illumina, San Diego, CA, USA). RNA  
52 sequencing library preparation used NEBNext Ultra RNA Library Prep Kit for Illumina by following the  
53 manufacturer's recommendations (NEB, Ipswich, MA, USA). Briefly, enriched RNAs were fragmented for 15  
54 minutes at 94 °C. First strand and second strand cDNA were subsequently synthesized. cDNA fragments were end  
55 repaired and adenylated at 3'ends, and universal adapter was ligated to cDNA fragments, followed by index  
56 addition and library enrichment with limited cycle PCR. Sequencing libraries were validated using the Agilent  
57 TapeStation 4200 (Agilent Technologies, Palo Alto, CA, USA), and quantified by using Qubit 2.0 Fluorometer  
58 (Invitrogen, Carlsbad, CA) as well as by quantitative PCR (Applied Biosystems, Carlsbad, CA, USA).

59 The sequencing libraries were clustered on one lane of a flowcell. After clustering, the flowcell was loaded on the  
60 Illumina HiSeq 4000 instrument (or equivalent) according to manufacturer's instructions. The samples were  
61 sequenced using a 2x150 Paired End (PE) configuration. Image analysis and base calling were conducted by the  
62 HiSeq Control Software (HCS). Raw sequence data (.bcl files) generated from Illumina HiSeq was converted into  
63 fastq files and de-multiplexed using Illumina's bcl2fastq 2.17 software. One mis-match was allowed for index  
64 sequence identification.

65 After investigating the quality of the raw data, sequence reads were trimmed to remove possible adapter sequences  
66 and nucleotides with poor quality using Trimmomatic v.0.36. The trimmed reads were mapped to the the Mus  
67 musculus GRCm38 reference genome available on ENSEMBL using the STAR aligner v.2.5.2b. Gene counts  
68 were calculated from uniquely mapped reads using feature Counts from the Subread package v.1.5.2. Only unique  
69 reads that fell within exon regions were counted.

70 The gene hit counts table was then used for downstream differential expression analysis. A differential gene  
71 expression analysis between WT and DKO groups of samples was performed using the R-package DESeq2 (Wald  
72 test). Genes with adjusted p-values < 0.05 and absolute log<sub>2</sub> fold changes > log<sub>2</sub>(1.5) were called as differentially  
73 expressed genes (DEG). A bi-clustering heatmap was used to visualize the expression profile of the top 40  
74 differentially expressed genes with the lowest adjusted p-value by plotting their log<sub>2</sub> transformed expression  
75 values in samples using the R-package pheatmap. A gene ontology analysis was performed on the statistically  
76 significant set of genes using DAVID functional annotation tool (<https://david.ncifcrf.gov/summary.jsp>). Gene Set  
77 Enrichment Analysis (GSEA) was performed on the full list of genes ranked by log<sub>2</sub> fold change using the WEB-

78 based Gene Set Analysis Toolkit (<http://www.webgestalt.org/>) with the functional database geneontology /  
79 Biological Process noRedundant.

80 We performed estimations of cell type abundances from our bulk lung transcriptomes using the method Cibersortx  
81 <sup>6</sup>. To accomplish this, we used single-cell reference transcriptome profiles collected from mice lungs (Travaglini  
82 et al <sup>7</sup>). We filtered from these single-cell data the cell types identified by less than 40 cells, and generated a  
83 signature matrix composed of 10,000 cells sampled from the remaining cell types. This signature matrix was then  
84 used by Cibersortx, with S-mode batch correction, to predict cell type fractions from our bulk lung transcriptomes.  
85 The heatmap showing cell type abundances per sample was produced with the pheatmap function in R.

86 Level of lung mRNA level encoding endothelin-1 were measured by qRT-PCR according to the method previously  
87 described <sup>3</sup>. To assess the mRNA level of other genes, mRNA was extracted using an RNeasy kit (Macherey,  
88 Nagel), reverse transcription was performed using iScript kit from Biorad and quantitative PCR was performed  
89 using SsoAdvanced SYBR green kit from Biorad. The Delta-Delta Ct ( $\Delta\Delta Ct$ ) method was used to obtain relative  
90 expression levels, normalized to *Rpl13a* levels. Primer sequences can be found in table S5.

91

### 92 **Blood analysis, Western Blot, histology, and immunostaining**

93 Whole blood or plasma was collected from 5-month-old mice. The total volume of blood collected via cardiac  
94 puncture was measured using a 2.5 mL graduated syringe. EDTA whole blood was analyzed using an XNL 550  
95 automated hematology analyzer (Sysmex). Li-heparin plasma (collected after 4 hours of fasting) was analyzed  
96 using AU-480 automated clinical chemistry analyzer (Beckman Coulter). Concentrations of atrial natriuretic  
97 peptide (ANP), brain natriuretic peptide (BNP), endothelin (ET)-1 and of hyaluronic acid (HA) in plasma were  
98 evaluated using specific ELISA Kits from Ray Biotech for ANP and BNP and from R&D for all the others,  
99 according to the manufacturer instructions. ELISA for BMP9, BMP10 or for the heterodimer BMP9-BMP10 were  
100 performed as previously described <sup>8</sup>.

101 Tissues were homogenized and sonicated in RIPA buffer containing protease and phosphatase inhibitors and 30  
102  $\mu\text{g}$  of protein was used to detect pSmad 1/5/8 (1/500, 13820 Cell Signaling), pSmad2/3 (1/200, 8828 Cell  
103 Signaling), and  $\beta$ -actin (1/400, A3854 Sigma).

104 Hematoxylin-Eosin (H&E; Sigma), Picrosirius red (Sigma) or Prussian blue (Merck) staining of the heart, lung,  
105 liver, spleen, and kidney tissues were performed using routine procedures. Images were acquired using Zeiss  
106 Axioplan or AxioScan microscopes and analyzed using Zen, Axiovision or Image J softwares. Cardiomyocyte size  
107 was determined by measuring the cross-sectional area of 100 cardiomyocytes in the left ventricular wall. Briefly,  
108 transverse heart sections (40- $\mu\text{m}$  thickness) were blocked with PBS 3% BSA, stained with fluorescein conjugated  
109 Wheat Germ Agglutinin (WGA) (5  $\mu\text{g}/\text{mL}$ , W834 Invitrogen) in PBS 1% BSA and with Hoechst (1/1000, 33342  
110 Sigma) for nuclear counterstaining. Images were acquired with a Zeiss ApoTome microscope (objective x40) and  
111 analyzed using Zen software (Zeiss). Diameters of pulmonary capillary vessels were determined in semi-thin lung  
112 sections (500-nm thickness) stained with epoxy tissue stain (EMS). Briefly, 1-2  $\text{mm}^3$  pieces of lung tissue were  
113 fixed overnight in 2% glutaraldehyde at 4°C, post-fixed in Osmium buffer, dehydrated and embedded in epoxy  
114 resin (EMS). Sections were then stained and images were acquired using a Zeiss axiovision microscope and  
115 analyzed using Image J software.

116 Immunohistochemistry staining for alpha-smooth muscle actin ( $\alpha$ -SM actin) were performed as previously  
117 described <sup>3</sup>. Briefly, lung sections (4- $\mu\text{m}$  thickness) were deparaffined and stained with (HE), or incubated with

118 retrieval buffer. Then, sections were saturated with blocking buffer and incubated overnight with  $\alpha$ -SM actin  
119 antibodies (1:200, sc32251, Santa Cruz), followed by corresponding secondary fluorescent-labeled antibodies  
120 (Thermo Fisher Scientific). Nuclei were labelled using DAPI (Thermo Fisher Scientific). Mounting was performed  
121 using ProLong Gold antifade reagent (Thermo Fisher Scientific). All images were taken using a LSM700 confocal  
122 microscope (Zeiss, Marly-le-Roi, France).

123

#### 124 **Chick Chorioallantoic Membrane (CAM) assay**

125 Fertilized Gallus gallus (Chicken) eggs were incubated at 37°C in a 65% humidified environment. They were  
126 rotated during 3 days (25° every 4h). On day 3, a window was created in the eggshell and sealed with medical  
127 tape. On day 10, a plastic ring (made from Nunc Thermanox coverslips) was placed on the surface of the CAM in  
128 each egg and received 50  $\mu$ L of control vehicle (PBS BSA 0.1% DMSO 0.5%) or treatment solution containing  
129 50 or 500  $\mu$ M of Bosentan (R&D), 50 or 500  $\mu$ M of Captopril (Tocris) or 0.5, 50 or 500  $\mu$ M of Terguride (Abcam)  
130 in association with 20 nM of BMP9 (R&D) or not. The CAM was observed and imaged under a macroscope (AZ-  
131 100 multizoom, Nikon) after 4h and 24h of treatment. After 24h of treatment, 100  $\mu$ L of FITC-Dextran solution  
132 was injected into the CAM vessels. Fluorescence images were taken using the 2X objective of the macroscope and  
133 automated quantification of the area of FITC positive vessels within the rings was performed using Angiotool  
134 software.

135

136

137

138 **SUPPLEMENTARY FIGURE LEGENDS**

139

140 Figure S1: BMP9, BMP10 and BMP9-BMP10 heterodimer concentration in mouse plasma measured by ELISA  
 141 (n=8-10 mice/group). (a) *Bmp9* and *Bmp10* mRNA levels in liver (b) heart (right atria) (c) and lungs (d),  
 142 normalized to *Rpl13a*. Data are presented as mean  $\pm$  SEM of n=8-10 male mice per group and analyzed using a  
 143 Kruskal Wallis test followed by a Dunn's test. \* $p < 0.05$ , \*\* $p < 0.01$ , \*\*\* $p < 0.001$ , \*\*\*\* $p < 0.0001$  vs WT

144

145 Figure S2: Combined loss of *Bmp9* and *Bmp10* leads to cardiomegaly and splenomegaly for both male and female  
 146 mice. Body weight, femur length and weight of the heart, liver, kidney and spleen of male (a) and female (b) mice.  
 147 All mice were injected with tamoxifen at the age of 2 months and sacrificed at the age of 5 months. Data are  
 148 presented as mean  $\pm$  SEM of n=9-11 mice/group and analyzed using a Kruskal Wallis test followed by a Dunn's  
 149 test. \*\* $p < 0.01$ , \*\*\*\* $p < 0.0001$  vs WT. # $p < 0.05$ ; ## $p < 0.01$ , ### $p < 0.001$  vs *Bmp9*-KO. \$ $p < 0.05$ ; \$\$ $p < 0.01$  vs  
 150 *Bmp10*-cKO.

151

152 Figure S3: Weight of the right ventricle (RV) (a) or left ventricle + septum (LV+S) (b) from WT and DKO mice  
 153 (n=6-7/group). Data are presented as mean  $\pm$  SEM and analyzed using a Mann-Whitney test. \*\* $p < 0.01$  vs WT.  
 154 Representative photomicrographs of spleen sections stained with hematoxylin and eosin, scale bar 500  $\mu$ m (c) and  
 155 of liver sections stained with Picrosirius red, scale bar 100  $\mu$ m (d). Quantitative analysis of the percentage area of  
 156 liver sections stained in red (e). Plasma concentration of hyaluronic acid (HA) determined by ELISA (f). All mice  
 157 were injected with tamoxifen at the age of 2 months and sacrificed at the age of 5 months. Data are presented as  
 158 mean  $\pm$  SEM of n=4-8 mice/group and analyzed using a Kruskal Wallis test followed by a Dunn's test. \* $p < 0.05$   
 159 vs WT. # $p < 0.05$  vs *Bmp9*-KO.

160

161 Figure S4: Relative mRNA levels of *Acvr11*, *Eng*, *Bmpr2*, *Id1*, *Smad6*, in lung (a), liver (b) right atria (c) and left  
 162 ventricle (d), normalized to *Rpl13a*. Representative western blots and quantitative analysis of pSmad1/5/8 and  
 163 pSmad2/3 protein level in lung tissue, normalized to  $\beta$ -actin levels (e) Data are presented as mean  $\pm$  SEM of n=6-  
 164 10 male mice per group and analyzed using a Kruskal Wallis test followed by a Dunn's test. \* $p < 0.05$ , \*\* $p < 0.01$ ,  
 165 \*\*\*\* $p < 0.0001$  vs WT

166

167 Figure S5: No obvious signs of cardiac fibrosis were observed after deletion of *Bmp9* and/or *Bmp10*. Heart sections  
 168 stained with Picrosirius red represented as a mosaic of photomicrographs to show the entire section, scale bar 200  
 169  $\mu$ m (a) or single photomicrographs, scale bar 100  $\mu$ m (b). Mice were injected with tamoxifen at the age of 2  
 170 months and sacrificed at the age of 4 months. n=4/group

171

172 Figure S6: Representative photomicrographs of clarified intestines (a) and brains (b) from latex blue WT and DKO  
 173 injected mice (n=4-6/group). Extracted blood volume of WT, *Bmp9*-KO, *Bmp10*-cKO and DKO mice (n=11-14  
 174 mice/group) (c). Data are presented as mean  $\pm$  SEM and analyzed using a Kruskal Wallis test followed by a Dunn's  
 175 test. \*\* $p < 0.01$  vs WT, # $p < 0.05$  vs *Bmp9*-KO. \$\$ $p < 0.01$  vs *Bmp10*-cKO (c). Representative photomicrographs of  
 176 the thyroid gland (d) of WT and DKO mice (n=8/group). All mice were injected with tamoxifen at the age of 2  
 177 months and sacrificed at the age of 4-5 months. Scale bar 1mm.

178

179 Figure S7: RNAseq analysis was performed on lung tissue from n=5 WT and n=7 DKO mice that were injected  
180 with tamoxifen at the age of 2 months and sacrificed at the age of 5 months. Genes with adjusted p-values < 0.05  
181 and absolute log<sub>2</sub> fold changes > log<sub>2</sub>(1.5) were called as differentially expressed genes (DEG). A gene ontology  
182 analysis was performed on these DEG using DAVID functional annotation tool  
183 (<https://david.ncifcrf.gov/summary.jsp>). Enriched gene ontologies sorted by modified Fisher Exact p-value (EASE  
184 score) were plotted, each data point in the dot plot represents a gene ontology, the -log<sub>10</sub> p-value is on the x-axis,  
185 the size of the dot represents the number of DEG and the color scale the percentage of DEG involved in the gene  
186 ontology term.

187

188 Figure S8: Relative mRNA levels (normalized to *Rpl13a*) of *Ccl2*, *Ccl3*, *Cxcl5* from lung (a) and of *Tbx20*, *Nkx2-*  
189 *5* from left ventricle (b). Data are presented as mean ± SEM of n=6-10 male mice per group and analyzed using a  
190 Kruskal Wallis test followed by a Dunn's test. \*p<0.05, \*\*p<0.01 vs WT

191 Heatmap of predicted percentages of the different cell types in lungs from WT and DKO mice (n=5 WT and n=7  
192 DKO mice per group) obtained using Cibersortx tool (c). Cell type abundances that were significantly different in  
193 DKO vs WT mice were visualized using bar plots (d). Data are presented as mean ± SEM and analyzed using a  
194 Mann-Whitney test \*p<0.05, \*\*p<0.01 vs WT.

195

196 Figure S9: Representative photomicrographs and quantitative analysis of FITC-Dextran injected blood vessels  
197 from chick chorioallantoic membranes treated with captopril (Capt) at 0, 50 and 500 μM, or terguride (Ter) at 0.5,  
198 50 and 500 μM in combination with BMP9 (20 nM) or not for 24 hours. Scale bar 250 μm. For captopril treated  
199 eggs, data are presented as mean ± SEM of n=3-4 eggs/condition and analyzed using a Mann Whitney test. \*p<0.05  
200 vs captopril treated condition without BMP9. For terguride treated eggs automated quantitative analysis was not  
201 possible for several eggs due to high background and mortality at 24h, therefore no statistical analysis was  
202 performed.

203

204

205 **SUPPLEMENTARY TABLES**

206

207 Table S1: Clinical chemistry and metabolic exploration. Biochemical analysis of plasma from n=6 WT, n=8 *Bmp9-*  
 208 KO, n=5 *Bmp10*-cKO and n=7 DKO mice. All mice were injected with tamoxifen at the age of 2 months and blood  
 209 was collected at the age of 5 months. LDH = lactate dehydrogenase, AST = aspartate aminotransferase, ALT =  
 210 alanine aminotransferase.

211

|                   |        | WT            |        | <i>Bmp9</i> -KO |        | <i>Bmp10</i> -cKO |        | DKO           |        |
|-------------------|--------|---------------|--------|-----------------|--------|-------------------|--------|---------------|--------|
|                   |        | MEAN          | SEM    | MEAN            | SEM    | MEAN              | SEM    | MEAN          | SEM    |
| Glucose           | mmol/l | <b>16.68</b>  | 1.53   | <b>15.04</b>    | 1.32   | <b>17.00</b>      | 0.64   | <b>12.23</b>  | 1.37   |
| Urea              | mmol/l | <b>7.37</b>   | 0.40   | <b>6.61</b>     | 0.40   | <b>7.18</b>       | 0.38   | <b>7.01</b>   | 0.40   |
| Sodium            | mmol/l | <b>152.17</b> | 0.60   | <b>150.63</b>   | 0.65   | <b>149.80</b>     | 0.20   | <b>152.43</b> | 0.84   |
| Potassium         | mmol/l | <b>4.57</b>   | 0.19   | <b>5.29</b>     | 0.39   | <b>4.38</b>       | 0.20   | <b>4.99</b>   | 0.31   |
| Chloride          | mmol/l | <b>113.00</b> | 0.93   | <b>113.88</b>   | 0.58   | <b>112.60</b>     | 0.68   | <b>115.43</b> | 1.27   |
| Total proteins    | g/l    | <b>49.33</b>  | 0.84   | <b>48.88</b>    | 0.74   | <b>48.60</b>      | 0.60   | <b>46.71</b>  | 1.15   |
| Albumin           | g/l    | <b>27.33</b>  | 0.49   | <b>27.13</b>    | 0.69   | <b>27.20</b>      | 0.20   | <b>25.29</b>  | 0.92   |
| Calcium           | mmol/l | <b>2.18</b>   | 0.01   | <b>2.15</b>     | 0.01   | <b>2.14</b>       | 0.02   | <b>2.12</b>   | 0.02   |
| Phosphorus        | mmol/l | <b>2.14</b>   | 0.10   | <b>2.03</b>     | 0.13   | <b>1.95</b>       | 0.10   | <b>2.51</b>   | 0.19   |
| Total bilirubin   | μmol/l | <b>3.18</b>   | 0.88   | <b>4.11</b>     | 1.25   | <b>2.16</b>       | 0.23   | <b>3.44</b>   | 1.02   |
| Creatine kinase   | U/l    | <b>159.33</b> | 70.35  | <b>162.00</b>   | 122.83 | <b>155.40</b>     | 25.42  | <b>104.86</b> | 22.22  |
| LDH               | U/l    | <b>683.17</b> | 209.29 | <b>569.71</b>   | 132.23 | <b>465.80</b>     | 113.35 | <b>637.29</b> | 108.10 |
| AST               | U/l    | <b>99.83</b>  | 21.77  | <b>89.86</b>    | 19.38  | <b>101.60</b>     | 9.42   | <b>90.71</b>  | 13.58  |
| ALT               | U/l    | <b>46.00</b>  | 15.74  | <b>23.71</b>    | 5.63   | <b>44.20</b>      | 7.30   | <b>18.86</b>  | 5.29   |
| ALP               | U/l    | <b>61.33</b>  | 3.96   | <b>66.88</b>    | 7.73   | <b>51.80</b>      | 3.62   | <b>53.71</b>  | 3.98   |
| Total cholesterol | mmol/l | <b>3.10</b>   | 0.31   | <b>2.61</b>     | 0.24   | <b>3.09</b>       | 0.15   | <b>2.48</b>   | 0.18   |
| Triglyceride      | mmol/l | <b>0.60</b>   | 0.06   | <b>0.48</b>     | 0.03   | <b>0.57</b>       | 0.06   | <b>0.46</b>   | 0.04   |
| Creatinine        | μmol/l | <b>8.33</b>   | 0.49   | <b>9.00</b>     | 1.48   | <b>7.40</b>       | 0.51   | <b>7.86</b>   | 0.34   |

212

213

214

215

216

217 Table S2: Hematological analysis. All mice were injected with tamoxifen at the age of 2 months and blood was  
 218 collected at the age of 5 months (n=5 WT, n=6 *Bmp9*-KO, n=5 *Bmp10*-cKO and n=7 DKO mice). WBC = white  
 219 blood cells, RBC = red blood cells, HGB = hemoglobin, HCT = hematocrit, MCV = mean corpuscular volume,  
 220 MCH = mean corpuscular hemoglobin, MCHC = mean corpuscular hemoglobin concentration, PLT = platelets,  
 221 MPV = mean platelet volume

222

|             |                                 | <b>WT</b>     |            | <b><i>Bmp9</i>-KO</b> |            | <b><i>Bmp10</i>-KO</b> |            | <b>DKO</b>    |            |
|-------------|---------------------------------|---------------|------------|-----------------------|------------|------------------------|------------|---------------|------------|
|             |                                 | <b>MEAN</b>   | <b>SEM</b> | <b>MEAN</b>           | <b>SEM</b> | <b>MEAN</b>            | <b>SEM</b> | <b>MEAN</b>   | <b>SEM</b> |
| <b>WBC</b>  | x10 <sup>3</sup> cells/ $\mu$ L | <b>15.70</b>  | 0.96       | <b>16.59</b>          | 1.58       | <b>16.34</b>           | 1.32       | <b>15.35</b>  | 1.27       |
| <b>RBC</b>  | x10 <sup>6</sup> cells/ $\mu$ L | <b>10.67</b>  | 0.40       | <b>9.09</b>           | 0.26       | <b>10.76</b>           | 0.18       | <b>9.04</b>   | 0.29       |
| <b>HGB</b>  | g/dL                            | <b>15.36</b>  | 0.45       | <b>13.33</b>          | 0.32       | <b>15.48</b>           | 0.32       | <b>13.63</b>  | 0.54       |
| <b>HCT</b>  | %                               | <b>50.38</b>  | 1.42       | <b>44.53</b>          | 1.12       | <b>51.42</b>           | 1.06       | <b>45.00</b>  | 1.53       |
| <b>MCV</b>  | fL                              | <b>47.26</b>  | 0.52       | <b>49.02</b>          | 0.76       | <b>47.78</b>           | 0.31       | <b>49.77</b>  | 0.77       |
| <b>MCH</b>  | pg                              | <b>14.42</b>  | 0.13       | <b>14.68</b>          | 0.19       | <b>14.38</b>           | 0.07       | <b>15.06</b>  | 0.31       |
| <b>MCHC</b> | g/dL                            | <b>30.46</b>  | 0.11       | <b>29.63</b>          | 0.39       | <b>30.10</b>           | 0.10       | <b>30.24</b>  | 0.22       |
| <b>PLT</b>  | x10 <sup>3</sup> cells/ $\mu$ L | <b>826.40</b> | 62.84      | <b>711.00</b>         | 92.20      | <b>748.25</b>          | 43.47      | <b>534.14</b> | 75.61      |
| <b>MPV</b>  | fL                              | <b>6.66</b>   | 0.05       | <b>6.78</b>           | 0.09       | <b>6.70</b>            | 0.05       | <b>6.84</b>   | 0.07       |

223

224



225 Table S3: Selection of enriched gene ontology terms and associated differentially expressed genes represented in  
 226 figure S7

| GO number  | GO term                                                    | Count | %    | PValue   | DEG                                                                                                                                                                                                                                            |
|------------|------------------------------------------------------------|-------|------|----------|------------------------------------------------------------------------------------------------------------------------------------------------------------------------------------------------------------------------------------------------|
| GO:0006954 | inflammatory response                                      | 34    | 6.75 | 1.06E-12 | CXCL1, C3AR1, CCL3, CXCL5, TNFRSF26, CXCL3, CCR1, PTGS1, CXCL2, CCL9, FPR1, CCL8, MMP25, CCL6, SLC11A1, CHIL4, CCL22, NAIP2, CHIL1, CCL20, CHIL3, ZC3H12A, SPP1, LIPA, OLR1, TLR13, CHST4, CCL17, PRKCQ, TNFRSF9, PLA2G7, TRP73, CLEC7A, BMP1B |
| GO:0007155 | cell adhesion                                              | 28    | 5.56 | 9.12E-06 | CADM3, CADM2, PCDH20, ITGAE, ITGB2, IGSF11, ITGAX, FAT3, TNF, GPNMB, SPP1, KIRREL3, TYRO3, CLCA2, OLR1, BMX, ACKR3, TINAGL1, CD84, LAMA1, LYVE1, ITGA6, DSG2, FREM2, FREM1, CD33, RELN, ADAM15                                                 |
| GO:0030574 | collagen catabolic process                                 | 7     | 1.39 | 1.01E-05 | CTSK, MMP8, MMP19, MMP16, CTSS, MMP13, ADAM15                                                                                                                                                                                                  |
| GO:0070374 | positive regulation of ERK1 and ERK2 cascade               | 15    | 2.98 | 6.91E-05 | CCL3, CCR1, CCL9, CCL8, ACKR3, ESR2, CCL6, CCL17, CCL22, CCL20, CHIL1, TREM2, GPNMB, HTR2B, HTR2A                                                                                                                                              |
| GO:0007204 | positive regulation of cytosolic calcium ion concentration | 12    | 2.38 | 4.15E-04 | CXCL1, C3AR1, CCKAR, GNA15, CCL3, P2RY2, CCR1, CXCL3, CXCL2, EDN1, FPR1, HTR2A                                                                                                                                                                 |
| GO:0022617 | extracellular matrix disassembly                           | 5     | 0.99 | 0.0012   | SH3PXD2B, LAMA1, MMP19, MMP13, MMP12                                                                                                                                                                                                           |
| GO:0014065 | phosphatidylinositol 3-kinase signaling                    | 5     | 0.99 | 0.0020   | EDN1, IGF1, PIK3R5, HTR2B, HTR2A                                                                                                                                                                                                               |
| GO:0055072 | iron ion homeostasis                                       | 6     | 1.19 | 0.0021   | LCN2, SLC11A1, STEAP4, EPB42, SLC40A1, B2M                                                                                                                                                                                                     |
| GO:0045766 | positive regulation of angiogenesis                        | 9     | 1.79 | 0.0051   | VEGFC, C3AR1, GDF2, LGALS3, CHIL1, PGF, LRG1, ZC3H12A, ITGB2                                                                                                                                                                                   |
| GO:0003341 | cilium movement                                            | 5     | 0.99 | 0.0069   | DNAH11, DNAH7B, HYDIN, DNAH5, DNAH6                                                                                                                                                                                                            |
| GO:0006811 | ion transport                                              | 23    | 4.56 | 0.0096   | KCNH1, STEAP4, CLCA2, SLC6A15, CFTR, KCNJ10, SLCO2B1, FXYP6, KCNK2, LRRC26, LCN2, SLC11A1, ATP2B2, SLC23A1, TTYH2, KCNN3, SLC4A1, SLC38A1, SLC40A1, ATP6V0D2, SLC4A5, GRID1, GABRP                                                             |
| GO:0030335 | positive regulation of cell migration                      | 11    | 2.18 | 0.0142   | C3AR1, IGF1R, SEMA6B, CCL3, PLET1, ITGA6, TIAM1, CCR1, EDN1, IGF1, GPNMB                                                                                                                                                                       |
| GO:0007229 | integrin-mediated signaling pathway                        | 7     | 1.39 | 0.0162   | NME2, ITGAX, ITGA6, ADAMTS20, ITGAE, ITGB2, ADAM15                                                                                                                                                                                             |
| GO:0001525 | angiogenesis                                               | 12    | 2.38 | 0.0164   | VEGFC, GDF2, OVOL2, PGF, LEPR, MMP19, ZC3H12A, ACKR3, TNFAIP2, VASH1, MMRN2, ADAM15                                                                                                                                                            |
| GO:0007599 | hemostasis                                                 | 5     | 0.99 | 0.0178   | ANXA8, PROZ, F8, SERPIND1, F7                                                                                                                                                                                                                  |
| GO:0030073 | insulin secretion                                          | 4     | 0.79 | 0.0404   | CCKAR, IL1RN, FFAR1, PCLO                                                                                                                                                                                                                      |
| GO:0008217 | regulation of blood pressure                               | 5     | 0.99 | 0.0465   | C3AR1, NPY, PTGS1, EDN1, DLL1                                                                                                                                                                                                                  |
| GO:0001938 | positive regulation of endothelial cell proliferation      | 5     | 0.99 | 0.0588   | VEGFC, GDF2, PGF, LRG1, HTR2B                                                                                                                                                                                                                  |
| GO:0007275 | multicellular organism development                         | 31    | 6.15 | 0.0673   | DHH, TNFRSF26, PGF, PAX5, OVOL2, FAT3, ZC3H12A, LHX6, UNC5D, TCF23, NGEF, ZFP423, MMP19, ACKR3, DLL1, SIX4, VEGFC, TNFRSF9, SEMA6B, HOXD8, m, NXN, FREM2, DBP, FREM1, GADD45G, WIF1, RELN, TNFAIP2, GAP43, KIF26B                              |
| GO:0045907 | positive regulation of vasoconstriction                    | 4     | 0.79 | 0.0749   | TBXAS1, SMAD6, PTGS1, HTR2A                                                                                                                                                                                                                    |

227  
228

229

230 Table S4: Lists of GO enriched terms and associated differentially expressed genes represented in figure 4b.  
 231 Downregulated genes are represented in blue and upregulated genes are represented in blue.

| category                               | GO number                                                       | GO term                                                                 | Nb of DEG | DEG                                                                                                                                                                                                                                                                                                                                                                                                                                                                                                                                                                                                             |
|----------------------------------------|-----------------------------------------------------------------|-------------------------------------------------------------------------|-----------|-----------------------------------------------------------------------------------------------------------------------------------------------------------------------------------------------------------------------------------------------------------------------------------------------------------------------------------------------------------------------------------------------------------------------------------------------------------------------------------------------------------------------------------------------------------------------------------------------------------------|
| <b>inflammation / immune response</b>  | GO:0006954                                                      | inflammatory response                                                   | 82        | CXCL1, MRC1, C3AR1, LCN2, ADGRE1, CCL22, LGALS3, GBP6, IL1R2, CD84, CCL3, PRKCQ, OLR1, TLR13, F830016B08RIK, IL1RN, TNFRSF9, CXCL5, TNFRSF26, CCL20, BMX, IIGP1, CXCL3, CCR1, CXCL2, VPREB3, STAR, LILRB4A, CCL9, CCL8, OAS2, TGTP2, EDN1, CHIL1, MALT1, TGTP1, CCL6, TRIM10, GM4951, FPR1, H2-Q7, CCL17, FCGR1, FCGR3, IL12B, ZC3H12A, B2M, ACKR3, C1QA, PTGS1, ITGB2, SUSD2, CLEC4N, CXCR1, MMP25, SLC11A1, CHIL4, NAIP2, CHIL3, SPP1, LIPA, CHST4, PLA2G7, TRP73, CLEC7A, BMPR1B, ACKR4, IGF1R, NFIL3, SMAD6, CTSS, TINAGL1, C1QB, CD300A, SERPINA3G, CD300LF, CLEC4D, CLEC5A, CD300LD, OAS1A, TREM2, ADAM15 |
|                                        | GO:0070098                                                      | chemokine-mediated signaling pathway                                    |           |                                                                                                                                                                                                                                                                                                                                                                                                                                                                                                                                                                                                                 |
|                                        | GO:0030593                                                      | neutrophil chemotaxis                                                   |           |                                                                                                                                                                                                                                                                                                                                                                                                                                                                                                                                                                                                                 |
|                                        | GO:0006955                                                      | immune response                                                         |           |                                                                                                                                                                                                                                                                                                                                                                                                                                                                                                                                                                                                                 |
|                                        | GO:0071346                                                      | cellular response to interferon-gamma                                   |           |                                                                                                                                                                                                                                                                                                                                                                                                                                                                                                                                                                                                                 |
|                                        | GO:0006935                                                      | chemotaxis                                                              |           |                                                                                                                                                                                                                                                                                                                                                                                                                                                                                                                                                                                                                 |
|                                        | GO:0071347                                                      | cellular response to interleukin-1                                      |           |                                                                                                                                                                                                                                                                                                                                                                                                                                                                                                                                                                                                                 |
|                                        | GO:0060326                                                      | cell chemotaxis                                                         |           |                                                                                                                                                                                                                                                                                                                                                                                                                                                                                                                                                                                                                 |
|                                        | GO:0002376                                                      | immune system process                                                   |           |                                                                                                                                                                                                                                                                                                                                                                                                                                                                                                                                                                                                                 |
|                                        | GO:0002548                                                      | monocyte chemotaxis                                                     |           |                                                                                                                                                                                                                                                                                                                                                                                                                                                                                                                                                                                                                 |
|                                        | GO:0048247                                                      | lymphocyte chemotaxis                                                   |           |                                                                                                                                                                                                                                                                                                                                                                                                                                                                                                                                                                                                                 |
|                                        | GO:0071356                                                      | cellular response to tumor necrosis factor                              |           |                                                                                                                                                                                                                                                                                                                                                                                                                                                                                                                                                                                                                 |
|                                        | GO:0045087                                                      | innate immune response                                                  |           |                                                                                                                                                                                                                                                                                                                                                                                                                                                                                                                                                                                                                 |
|                                        | GO:0035458                                                      | cellular response to interferon-beta                                    |           |                                                                                                                                                                                                                                                                                                                                                                                                                                                                                                                                                                                                                 |
| GO:0090023                             | positive regulation of neutrophil chemotaxis                    |                                                                         |           |                                                                                                                                                                                                                                                                                                                                                                                                                                                                                                                                                                                                                 |
| GO:2000660                             | negative regulation of interleukin-1-mediated signaling pathway |                                                                         |           |                                                                                                                                                                                                                                                                                                                                                                                                                                                                                                                                                                                                                 |
| GO:2001180                             | negative regulation of interleukin-10 secretion                 |                                                                         |           |                                                                                                                                                                                                                                                                                                                                                                                                                                                                                                                                                                                                                 |
| <b>ion transport</b>                   | GO:0007204                                                      | positive regulation of cytosolic calcium ion concentration              | 38        | KCNH1, STEAP4, CLCA2, SLC6A15, CFTR, KCNJ10, SLCO2B1, FXYP6, KCNK2, LRRC26, LCN2, SLC11A1, ATP2B2, SLC23A1, TTYH2, KCNN3, SLC4A1, SLC38A1, SLC40A1, ATP6V0D2, SLC4A5, GRID1, GABRP, CXCL1, C3AR1, CCKAR, GNA15, CCL3, P2RY2, CCR1, CXCL3, CXCL2, EDN1, FPR1, HTR2A, ATP2B2, FFAR1, LPAR3                                                                                                                                                                                                                                                                                                                        |
|                                        | GO:0051928                                                      | positive regulation of calcium ion transport                            |           |                                                                                                                                                                                                                                                                                                                                                                                                                                                                                                                                                                                                                 |
|                                        | GO:0006811                                                      | ion transport                                                           |           |                                                                                                                                                                                                                                                                                                                                                                                                                                                                                                                                                                                                                 |
| <b>ECM disassembly</b>                 | GO:0030574                                                      | collagen catabolic process                                              | 30        | DHH, RBP3, MMP8, MMP25, PROZ, DPP6, PCSK5, CLCA2, ADAMTS20, MMP19, MMP17, MMP16, MALT1, CTSS, F7, TINAGL1, MMP13, MMP12, CTSK, CTSD, RELN, PRSS23, PHEX, ADAMDEC1, ADAM15, ASPRV1, ADAMTS4, CTSK, SH3PXD2B, LAMA1                                                                                                                                                                                                                                                                                                                                                                                               |
|                                        | GO:0006508                                                      | proteolysis                                                             |           |                                                                                                                                                                                                                                                                                                                                                                                                                                                                                                                                                                                                                 |
|                                        | GO:0022617                                                      | extracellular matrix disassembly                                        |           |                                                                                                                                                                                                                                                                                                                                                                                                                                                                                                                                                                                                                 |
| <b>adhesion</b>                        | GO:0007155                                                      | cell adhesion                                                           | 30        | CADM3, CADM2, PCDH20, ITGAE, ITGB2, IGSF11, ITGAX, FAT3, TNF, GPNMB, SPP1, KIRREL3, TYRO3, CLCA2, OLR1, BMX, ACKR3, TINAGL1, CD84, LAMA1, LYVE1, ITGA6, DSG2, FREM2, FREM1, CD33, RELN, ADAM15, NME2, ADAMTS20                                                                                                                                                                                                                                                                                                                                                                                                  |
|                                        | GO:0007229                                                      | integrin-mediated signaling pathway                                     |           |                                                                                                                                                                                                                                                                                                                                                                                                                                                                                                                                                                                                                 |
| <b>angiogenesis</b>                    | GO:0045766                                                      | positive regulation of angiogenesis                                     | 18        | VEGFC, C3AR1, GDF2, LGALS3, CHIL1, PGF, LRG1, ZC3H12A, ITGB2, OVOL2, LEPR, MMP19, ACKR3, TNFAIP2, VASH1, MMRN2, ADAM15, HTR2B                                                                                                                                                                                                                                                                                                                                                                                                                                                                                   |
|                                        | GO:0001525                                                      | angiogenesis                                                            |           |                                                                                                                                                                                                                                                                                                                                                                                                                                                                                                                                                                                                                 |
|                                        | GO:0001938                                                      | positive regulation of endothelial cell proliferation                   |           |                                                                                                                                                                                                                                                                                                                                                                                                                                                                                                                                                                                                                 |
| <b>blood pressure / vasoreactivity</b> | GO:0045019                                                      | negative regulation of nitric oxide biosynthetic process                | 14        | GLA, ACP5, ZC3H12A, C3AR1, GNA15, P2RY2, FPR1, HTR2A, NPY, PTGS1, EDN1, DLL1, TBXAS1, SMAD6                                                                                                                                                                                                                                                                                                                                                                                                                                                                                                                     |
|                                        | GO:0007200                                                      | phospholipase C-activating G-protein coupled receptor signaling pathway |           |                                                                                                                                                                                                                                                                                                                                                                                                                                                                                                                                                                                                                 |
|                                        | GO:0008217                                                      | regulation of blood pressure                                            |           |                                                                                                                                                                                                                                                                                                                                                                                                                                                                                                                                                                                                                 |
|                                        | GO:0045907                                                      | positive regulation of vasoconstriction                                 |           |                                                                                                                                                                                                                                                                                                                                                                                                                                                                                                                                                                                                                 |

233 Table S5. List of Primer

234 Primers for quantitative RT-PCR were designed using Primer-Blast on GenBank sequences and are separated by  
 235 at least one intron or span an exon-exon junction for intron containing genes.

| Gene                | GenBank sequences | Forward (5'-3')          | Reverse (5'-3')          |
|---------------------|-------------------|--------------------------|--------------------------|
| <i>Rpl13a</i>       | NM_009438.5       | CCCTCCACCCTATGACAAGA     | TTCTCCTCCAGAGTGGCTGT     |
| <i>Id1</i>          | NM_010495.3       | CGCTCAGCACCCCTGAACGGC    | TCCGGTGGCTGCGGTAGTGT     |
| <i>Acv1r1</i>       | NM_009612.3       | CCTCACGAGATGAGCAGTCC     | GGCGATGAAGCCTAGGATGTT    |
| <i>Bmpr2</i>        | NM_007561.4       | TGGCAGTGAGGTCACTCAAG     | TTGCGTTCATTCTGCATAGC     |
| <i>Eng</i>          | NM_001146348.1    | GCCAAAGTGTGGCAATCAGG     | TGGTCGTCAGTGTCTTCAGC     |
| <i>Bmp10</i>        | NM_009756.3       | TCCATGCCGTCTGCTAACATCATC | ACATCATGCGATCTCTCTGCACCA |
| <i>Smad6</i>        | NM_008542.3       | CTGCGGGCCAGAATCACCGC     | GCTCGGCTTGGTGGCATCCG     |
| <i>Edn-1</i>        | NM_010104.4       | GGCCCAAAGTACCATGCAGA     | TGCTATTGCTGATGGCCTCC     |
| <i>Nkx2-5</i>       | NM_008700.2       | GACCCTCGGGCGGATAAAAA     | CCATCCGTCTCGGCTTTGT      |
| <i>Tbx20</i>        | NM_194263.2       | GTTTGCCAAAGGATTCCGGG     | CCGGGCATAGGAATGCTTCT     |
| <i>Cxcl5</i>        | NM_009141.3       | CGGTTCCATCTCGCCATTCA     | GCTATGACTGAGGAAGGGGC     |
| <i>Ccl3</i>         | NM_011337.2       | ATATGGAGCTGACACCCCGA     | AGCAAAGGCTGCTGGTTTCA     |
| <i>Ccl2</i>         | NM_011333.3       | CTGCATCTGCCCTAAGGTCT     | AGTGCTTGAGGTGGTTGTGG     |
| <i>Bmp9 (Gdf-2)</i> | NM_019506.4       | CAATGACCGCAGCAATGGG      | AAGCATGGTCTCCTGCTCAT     |

236

237

238 **SUPPLEMENTARY REFERENCES**

- 239 1. Guignabert C, Alvira CM, Alastalo TP, Sawada H, Hansmann G, Zhao M, Wang L, El-Bizri N,  
240 Rabinovitch M. Tie2-mediated loss of peroxisome proliferator-activated receptor-gamma in  
241 mice causes PDGF receptor-beta-dependent pulmonary arterial muscularization. *Am J Physiol*  
242 *Lung Cell Mol Physiol* 2009;**297**:L1082-1090.
- 243 2. Guignabert C, Izikki M, Tu LI, Li Z, Zadigue P, Barlier-Mur AM, Hanoun N, Rodman D, Hamon  
244 M, Adnot S, Eddahibi S. Transgenic mice overexpressing the 5-hydroxytryptamine transporter  
245 gene in smooth muscle develop pulmonary hypertension. *Circ Res* 2006;**98**:1323-1330.
- 246 3. Tu L, Desroches-Castan A, Mallet C, Guyon L, Cumont A, Phan C, Robert F, Thuillet R,  
247 Bordenave J, Sekine A, Huertas A, Ritvos O, Savale L, Feige J-J, Humbert M, Bailly S,  
248 Guignabert C. Selective BMP-9 Inhibition Partially Protects Against Experimental Pulmonary  
249 Hypertension. *Circulation Research* 2019;**124**:846-855.
- 250 4. Bordenave J, Thuillet R, Tu L, Phan C, Simonneau G, Huertas A, Hibert M, Bonnet D, Humbert  
251 M, Frossard N, Guignabert C. Neutralization of CXCL12 reverses established pulmonary  
252 hypertension in the sugen-hypoxia rat model. *Eur Respir J* 2017;**50**:PA2385.
- 253 5. Tual-Chalot S, Garcia-Collado M, Redgrave RE, Singh E, Davison B, Park C, Lin H, Luli S, Jin Y,  
254 Wang Y, Lawrie A, Jakobsson L, Arthur HM. Loss of Endothelial Endoglin Promotes High-  
255 Output Heart Failure Through Peripheral Arteriovenous Shunting Driven by VEGF Signaling.  
256 *Circ Res* 2020;**126**:243-257.
- 257 6. Newman AM, Steen CB, Liu CL, Gentles AJ, Chaudhuri AA, Scherer F, Khodadoust MS,  
258 Esfahani MS, Luca BA, Steiner D, Diehn M, Alizadeh AA. Determining cell type abundance and  
259 expression from bulk tissues with digital cytometry. *Nat Biotechnol* 2019;**37**:773-782.
- 260 7. Travaglini KJ, Nabhan AN, Penland L, Sinha R, Gillich A, Sit RV, Chang S, Conley SD, Mori Y,  
261 Seita J, Berry GJ, Shrager JB, Metzger RJ, Kuo CS, Neff N, Weissman IL, Quake SR, Krasnow  
262 MA. A molecular cell atlas of the human lung from single-cell RNA sequencing. *Nature*  
263 2020;**587**:619-625.
- 264 8. Tillet E, Ouarne M, Desroches-Castan A, Mallet C, Subileau M, Didier R, Lioutsko A, Belthier G,  
265 Feige JJ, Bailly S. A heterodimer formed by bone morphogenetic protein 9 (BMP9) and  
266 BMP10 provides most BMP biological activity in plasma. *J Biol Chem* 2018;**293**:10963-10974.

267

Figure S1

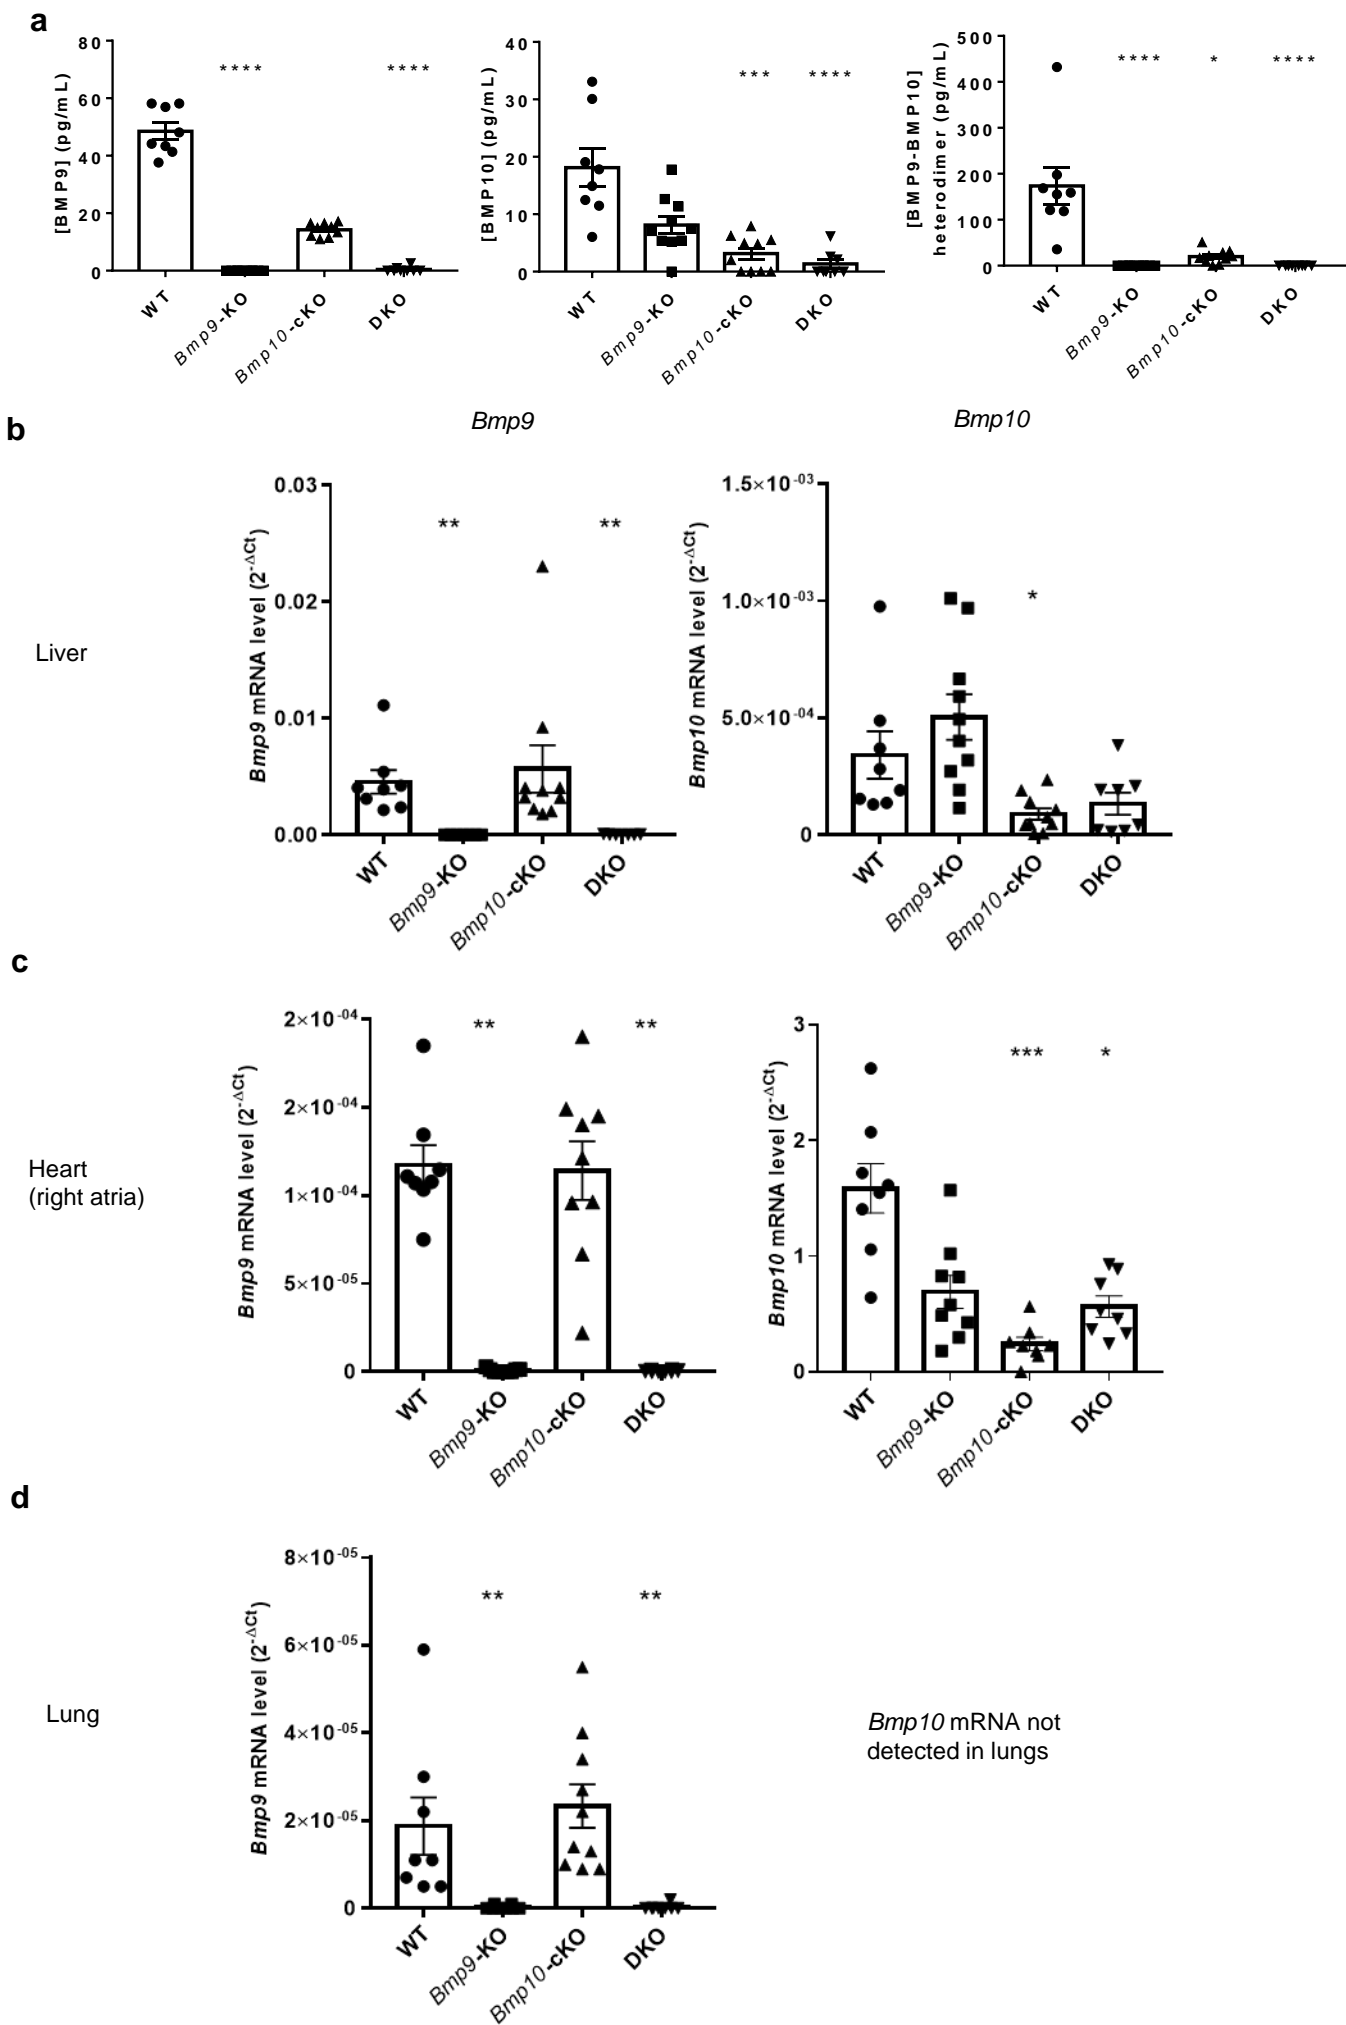

Figure S2

**a**

**Male mice**

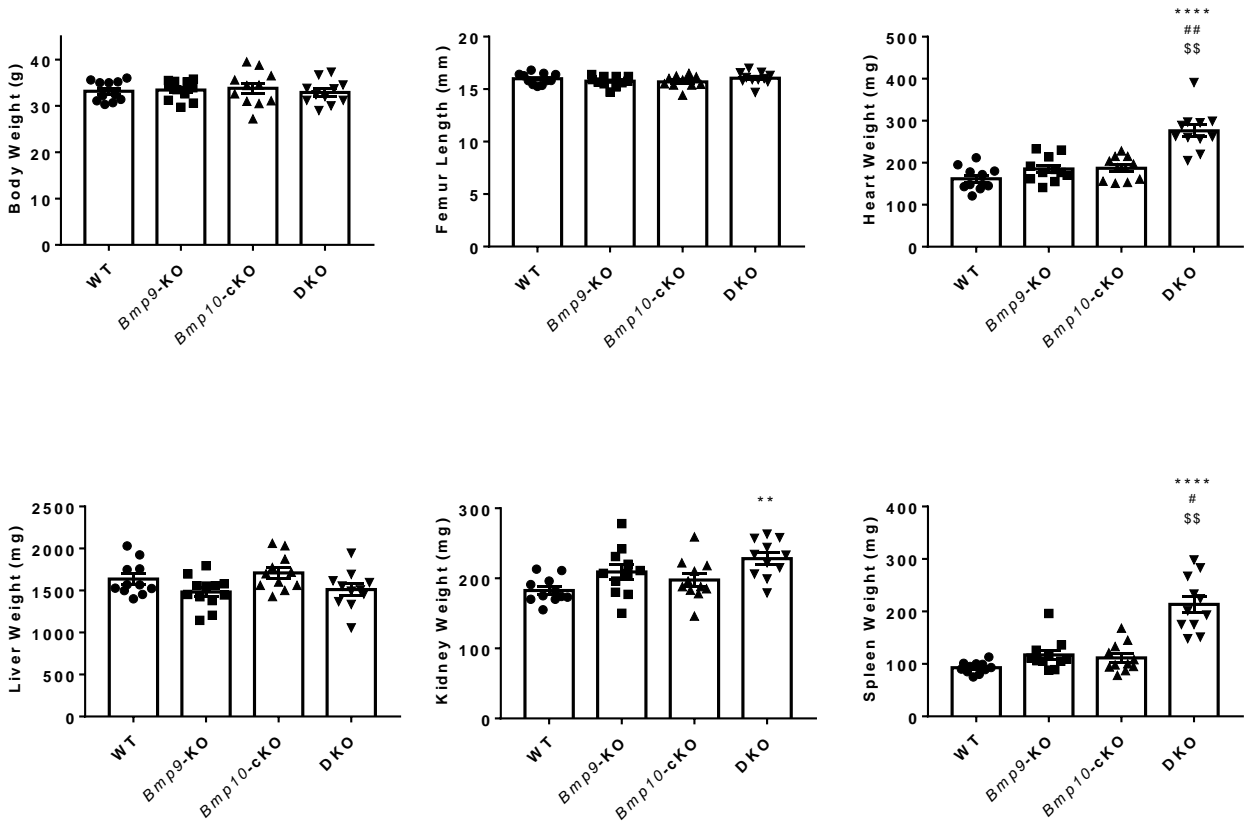

**b**

**Female mice**

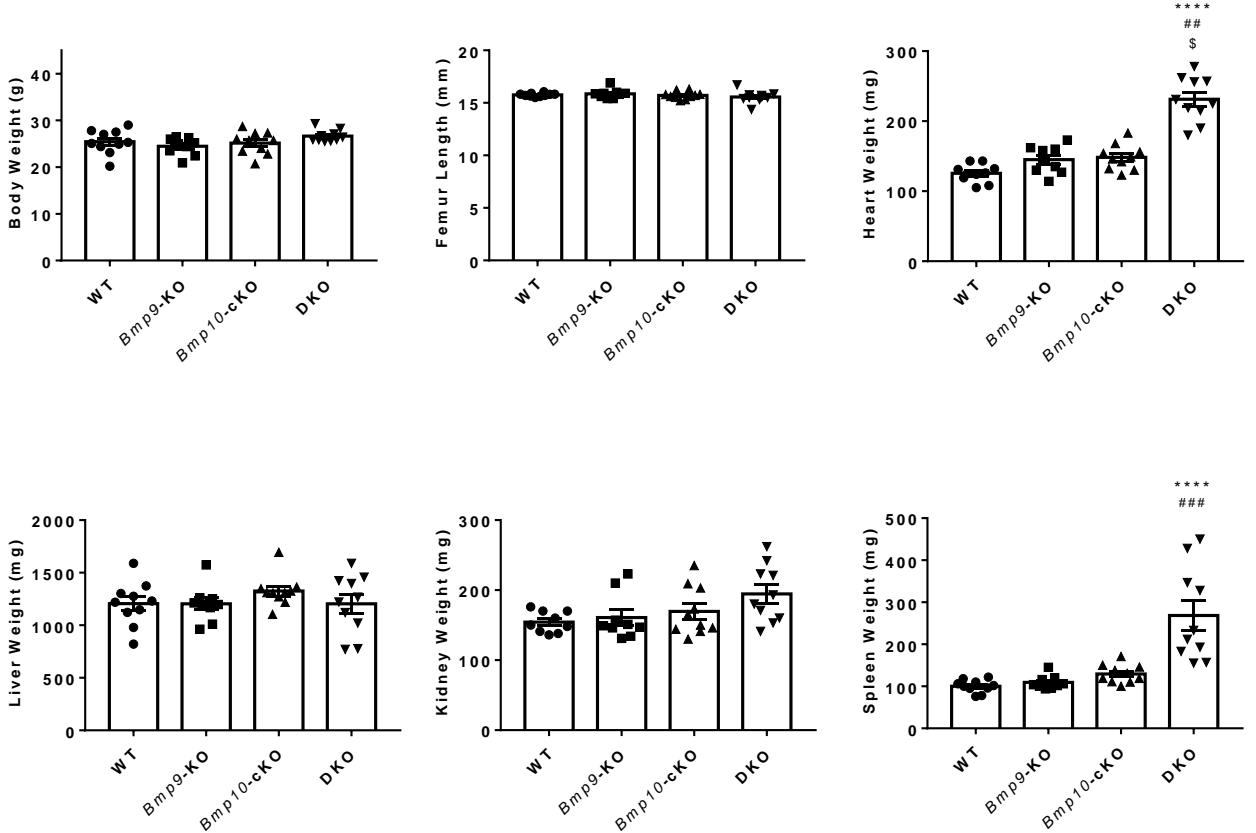

Figure S3

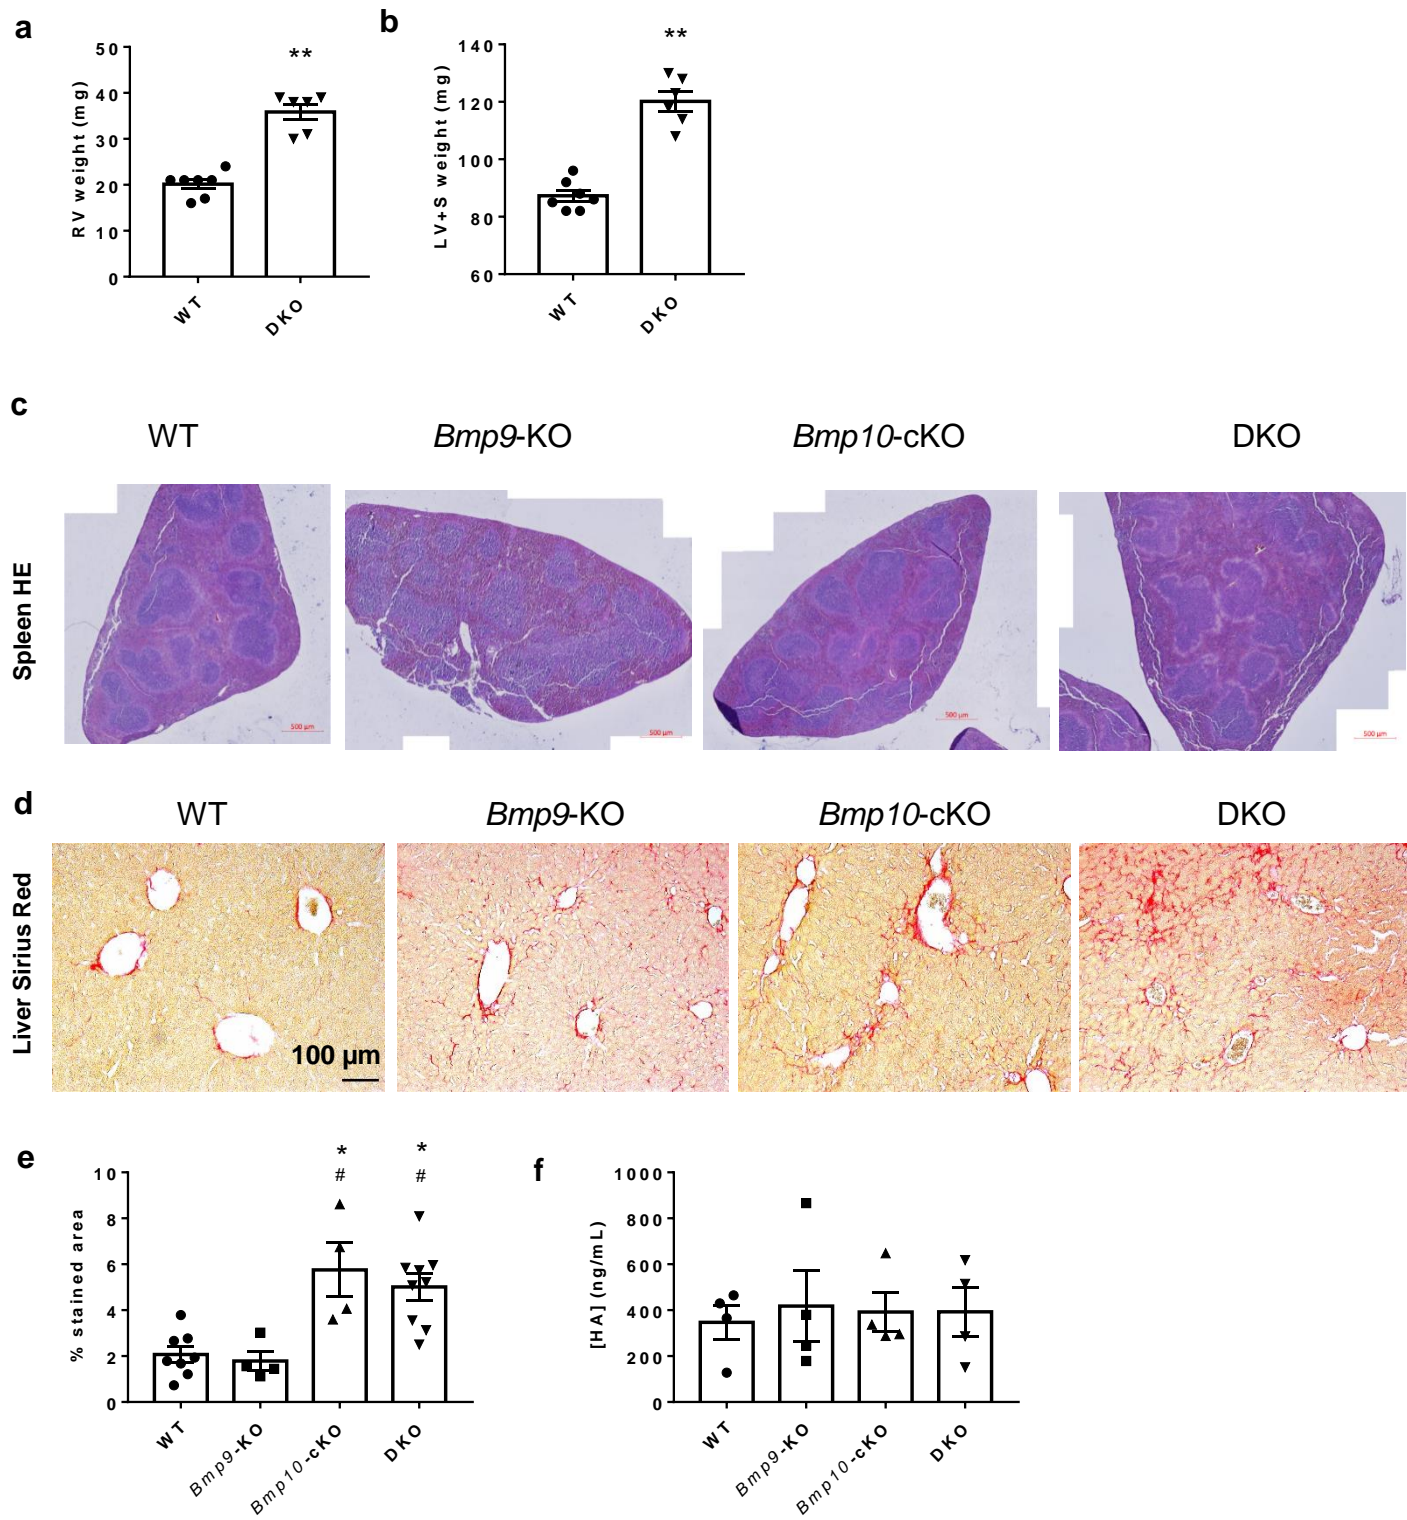

Figure S4

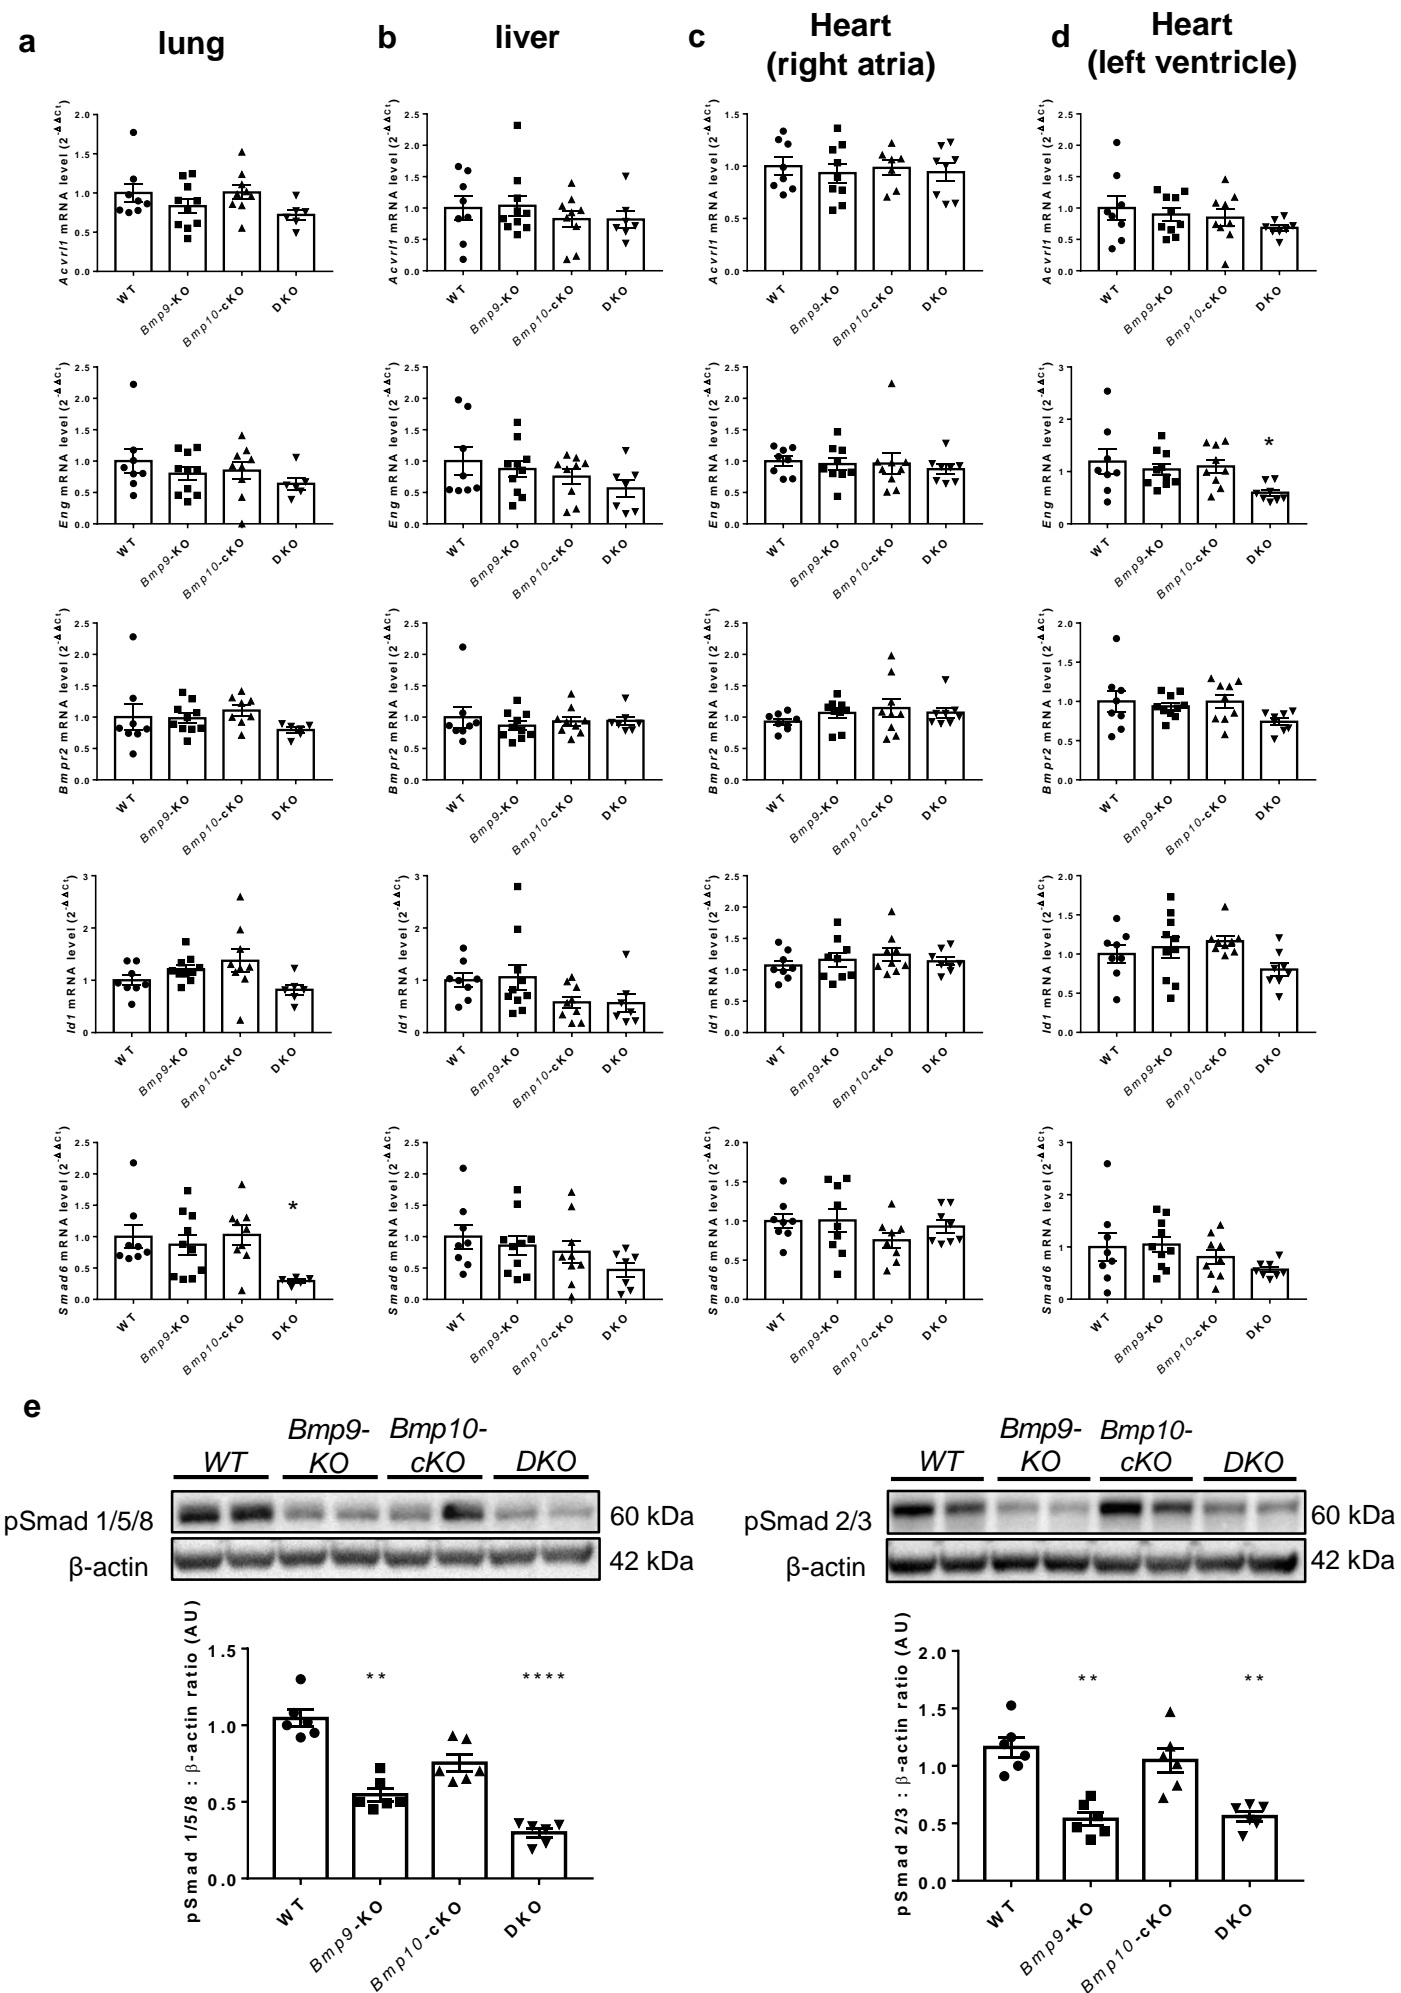



Figure S5

a

**WT**

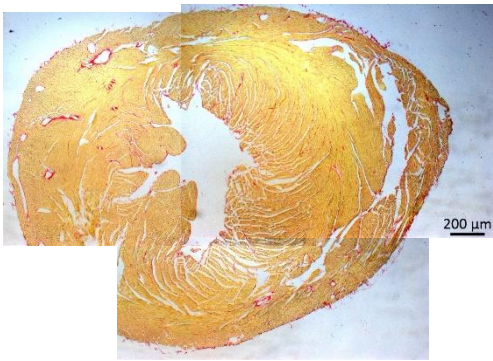

***Bmp9*-KO**

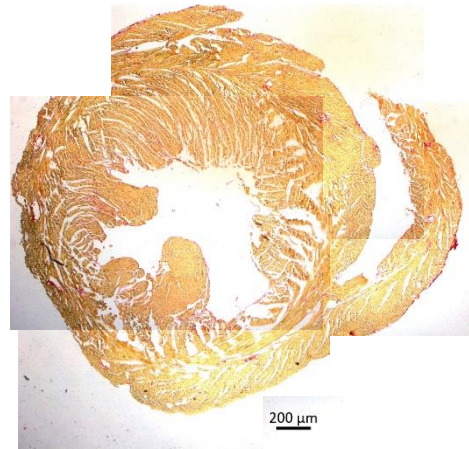

***Bmp10*-cKO**

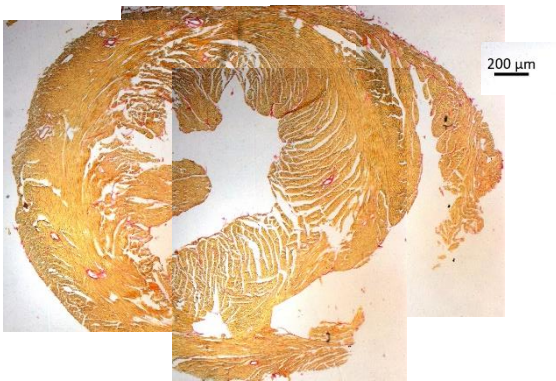

**DKO**

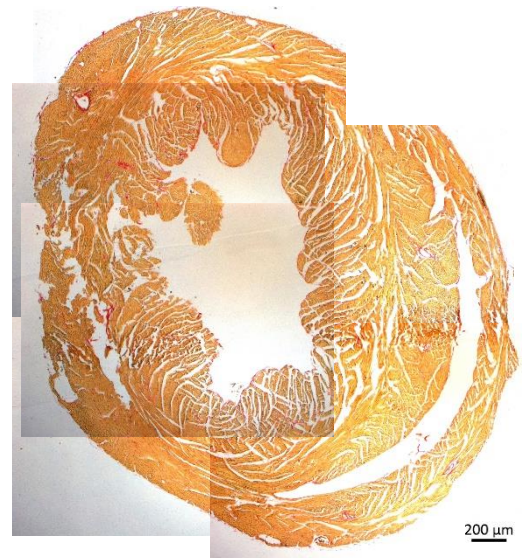

b

**WT**

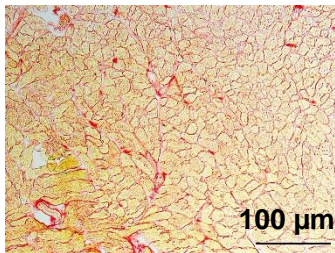

***Bmp9*-KO**

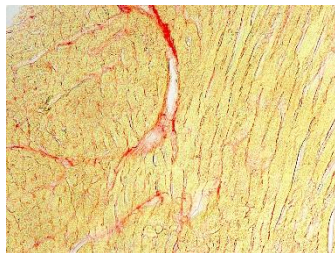

***Bmp10*-cKO**

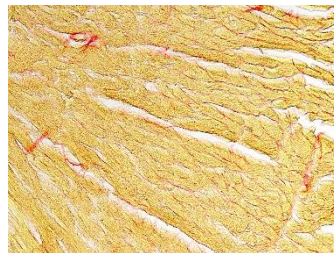

**DKO**

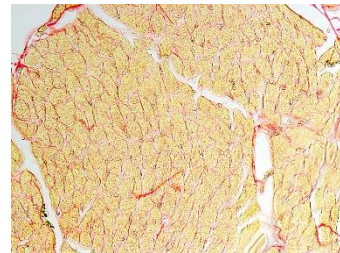



Figure S6

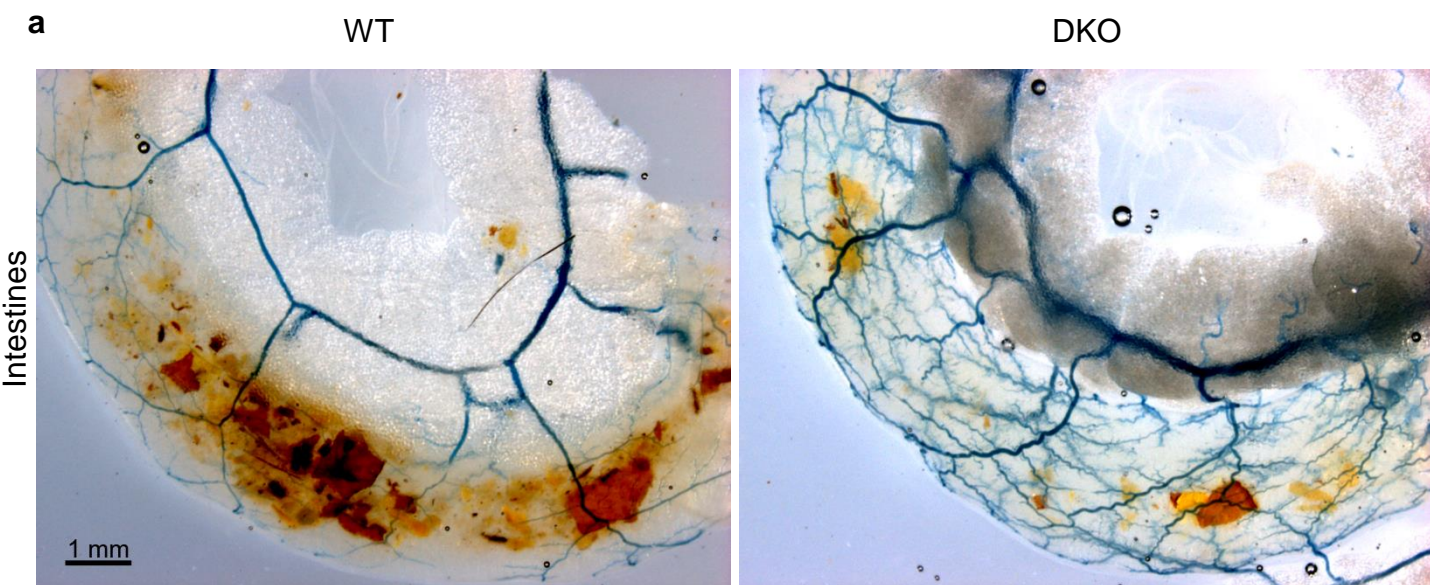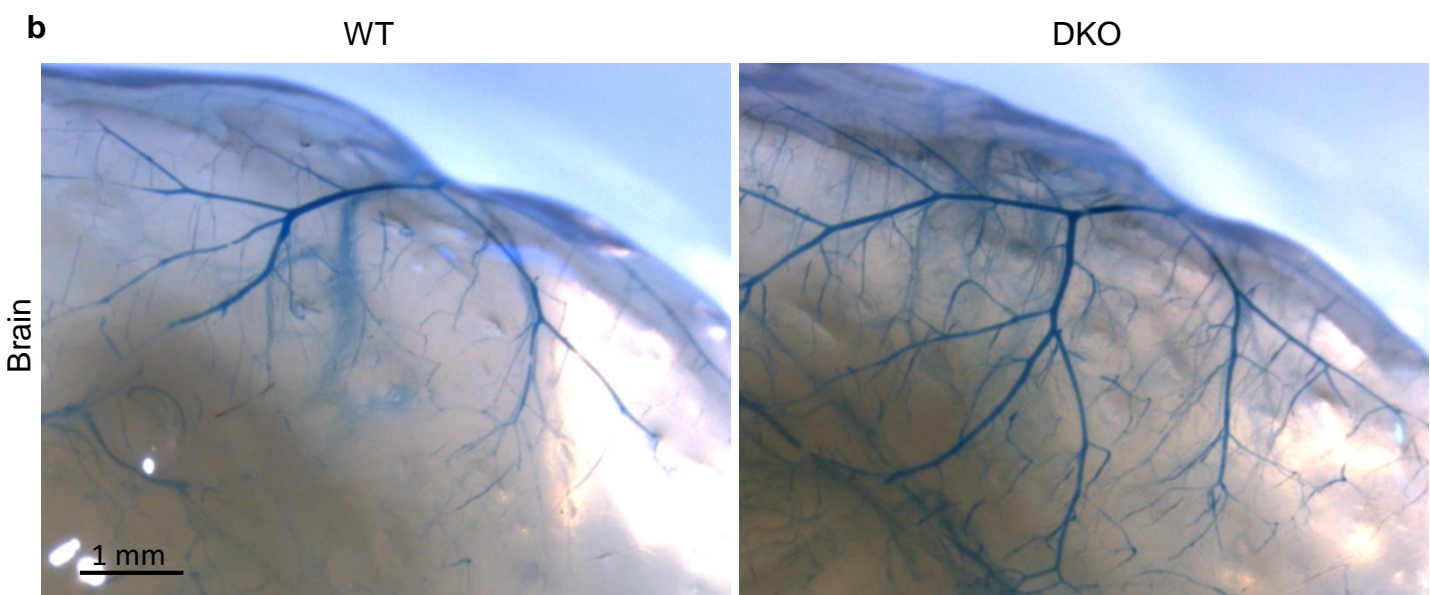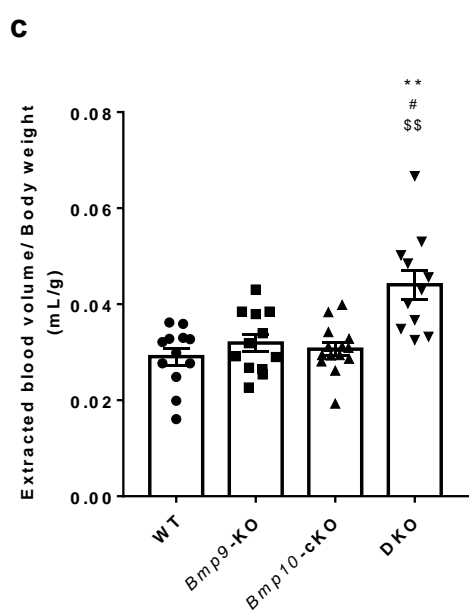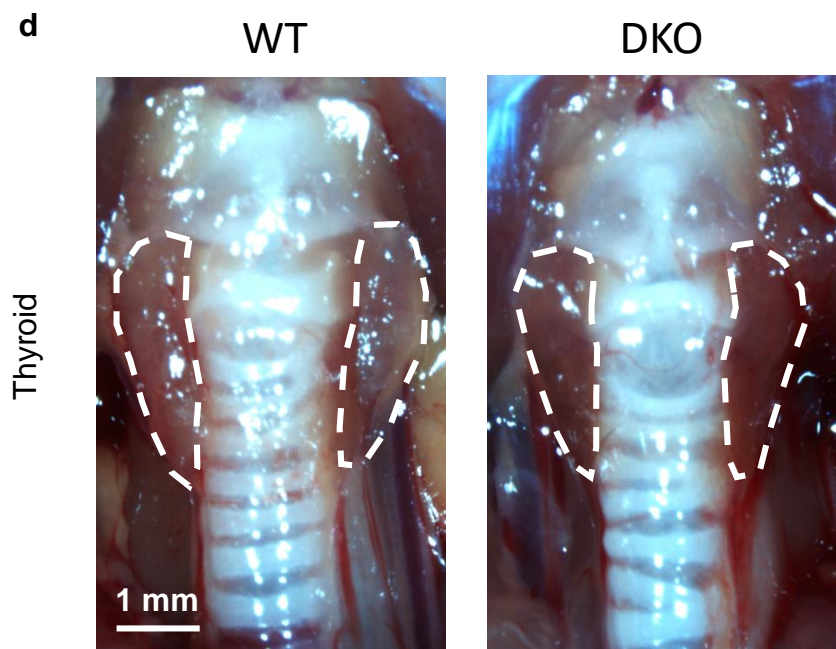

Figure S7

Gene Ontology Biological Process : top20

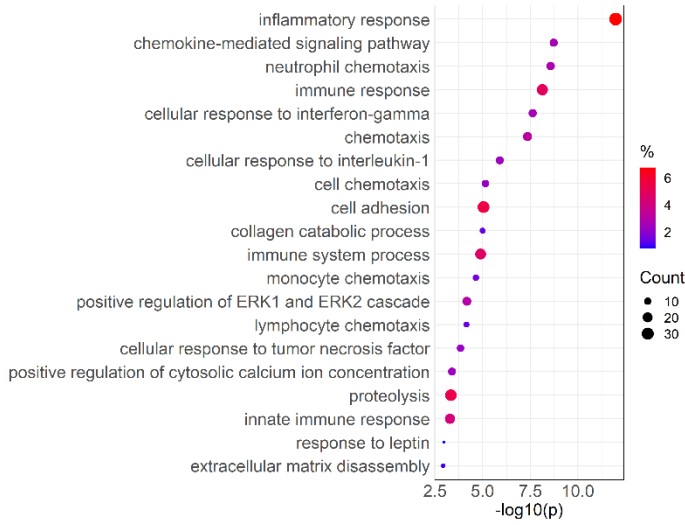

Gene Ontology Biological Process : selection

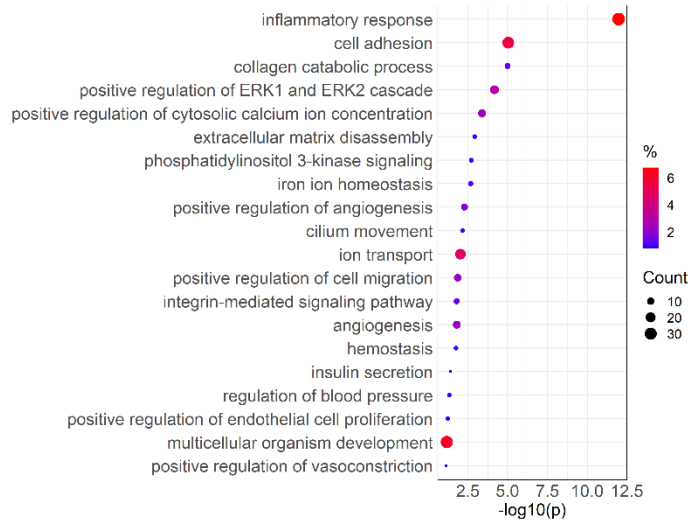

Gene Ontology Molecular Function : top20

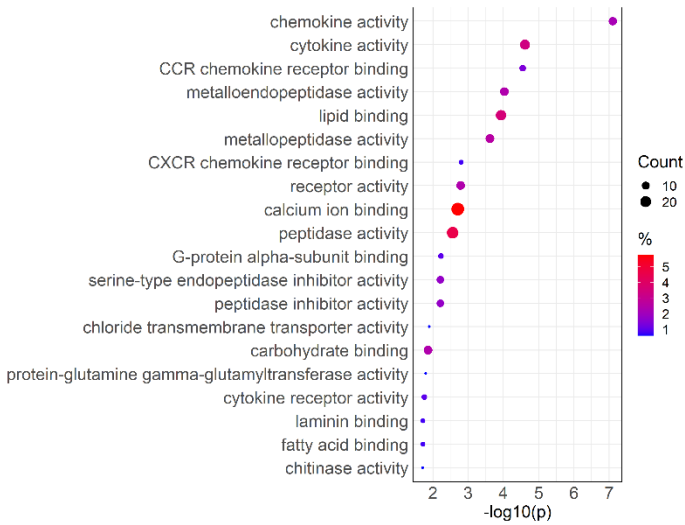

Gene Ontology Cellular Component : top20

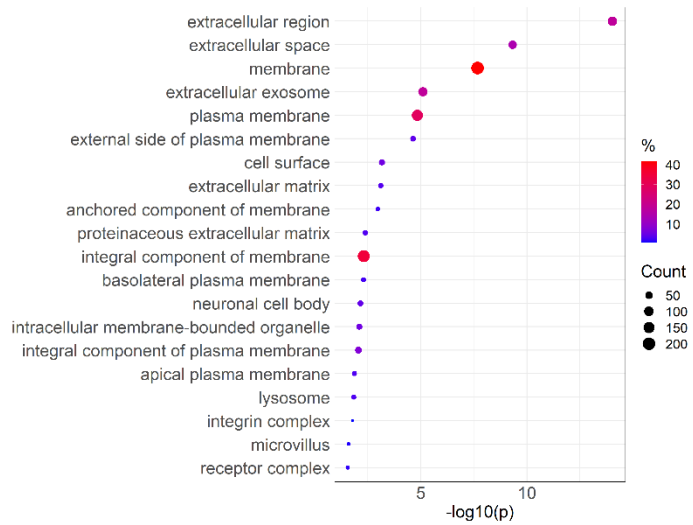

KEGG

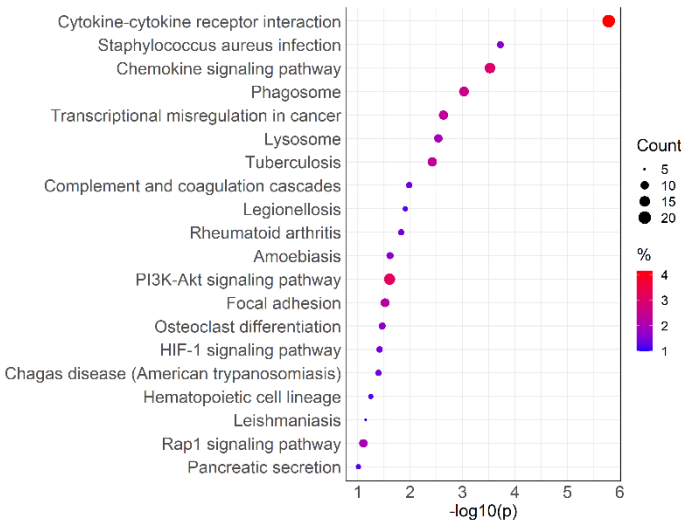

Figure S8

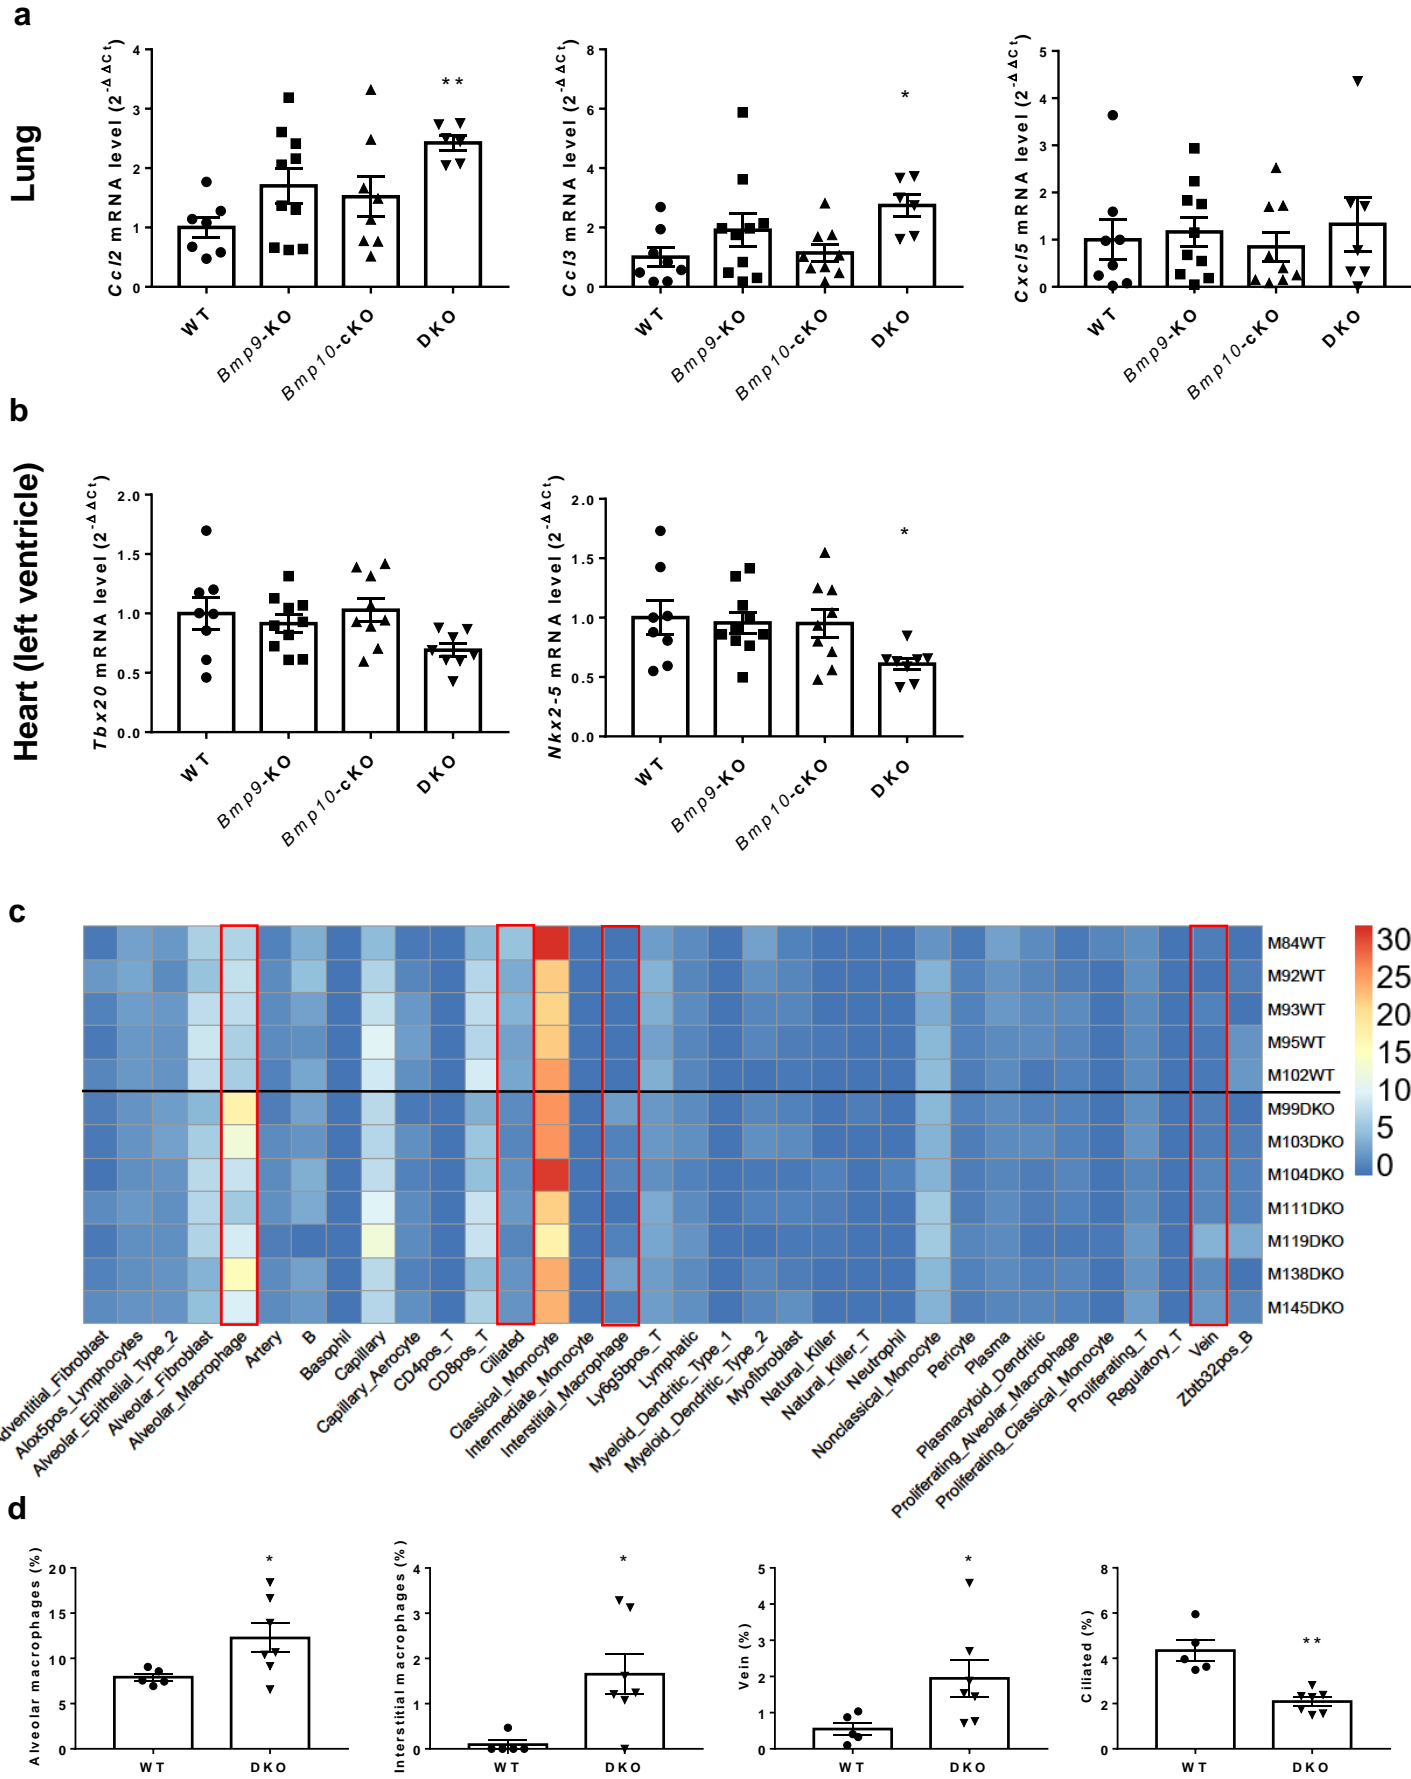



Figure S9

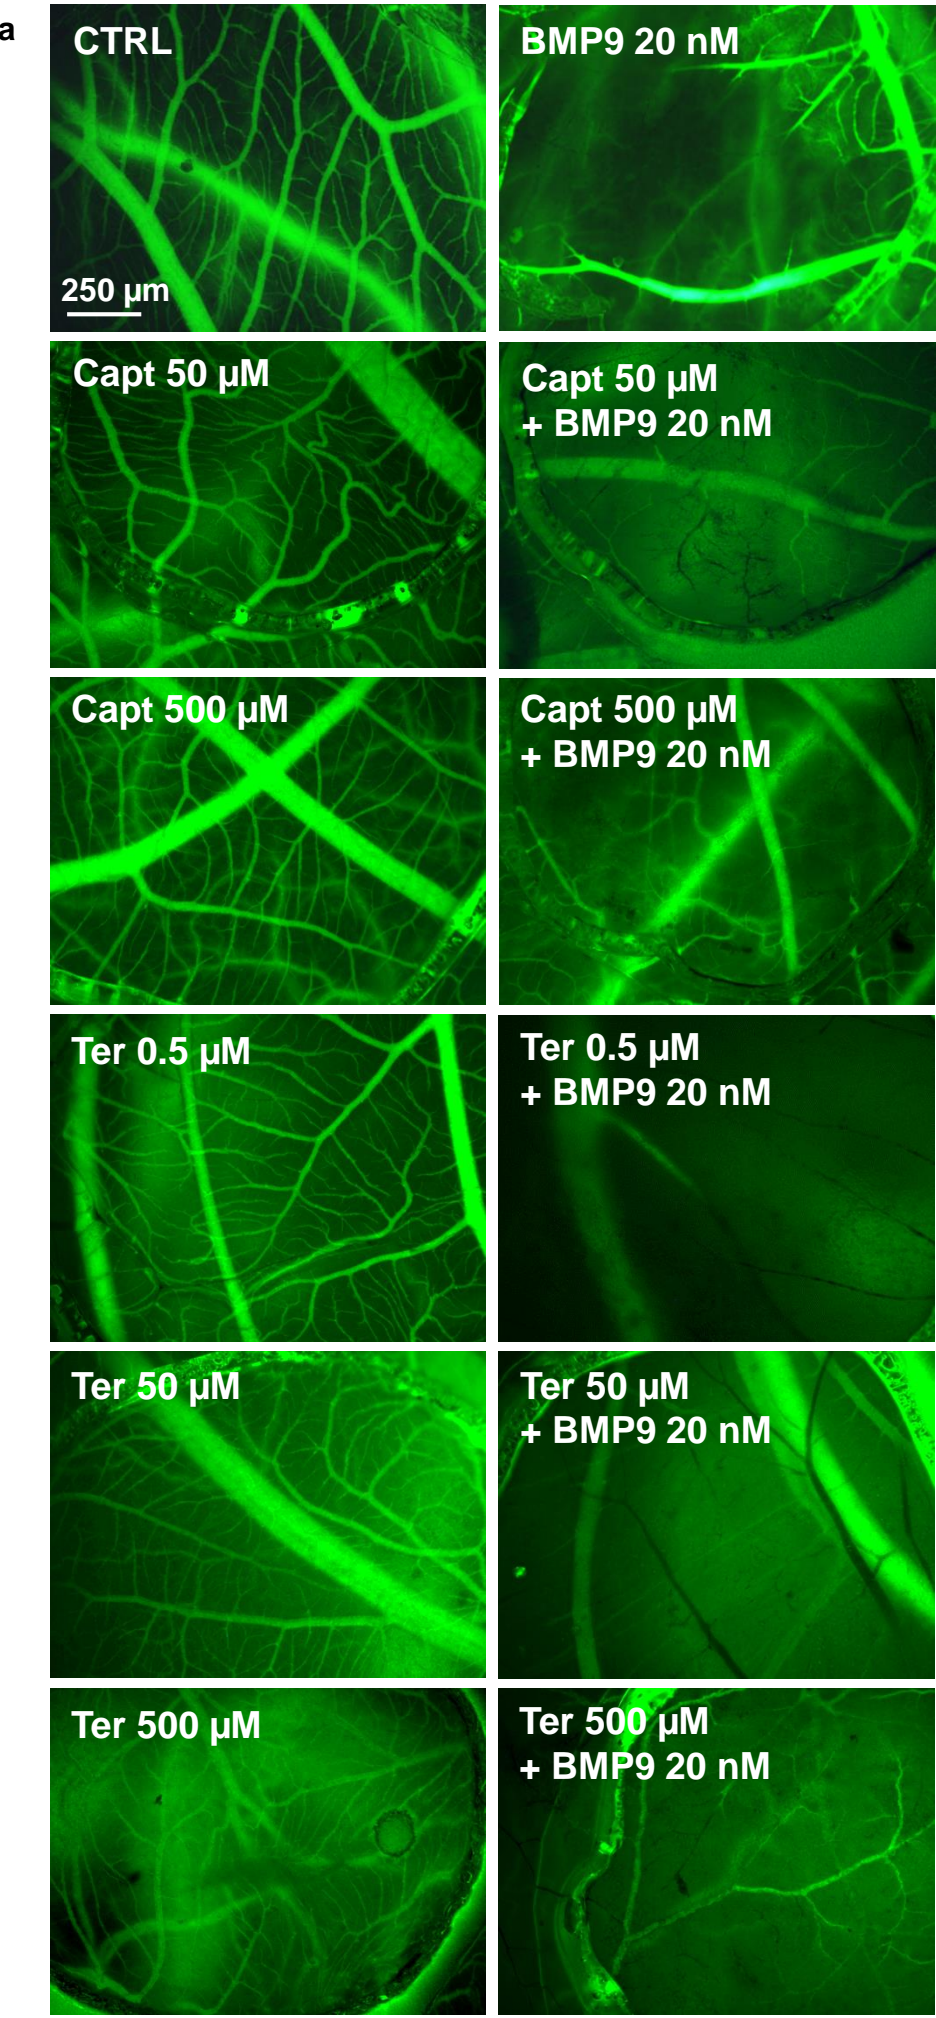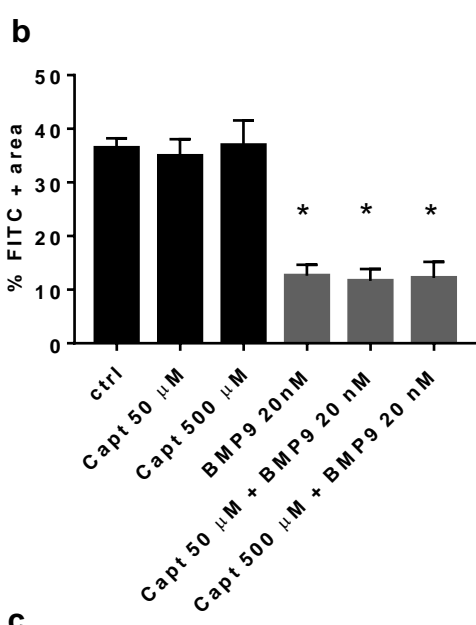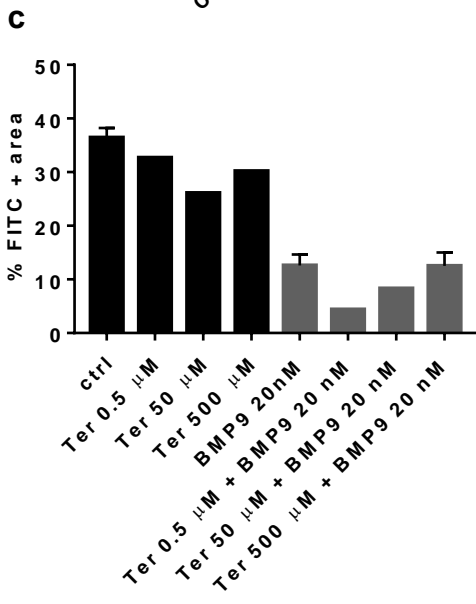

Supplement: cvab187_supplementary_data.pdf [file cvab187_supplementary_data.pdf]
